# Supplementary material for: Influence of substituents in aryl groups on the structure, thermal transitions and electrorheological properties of zinc bis(diarylphosphate) hybrid polymers
Source: Royal Society of Chemistry journal article supplement (doi:10.1039/d2dt00492e), 2022-01-01
Supplement: d2dt00492e1.pdf [file d2dt00492e1.pdf]

Supporting information for *INFLUENCE OF SUBSTITUENTS IN ARYL GROUPS ON THE STRUCTURE AND THERMAL TRANSITIONS OF ZINC BIS(DIARYLPHOSPHATE) HYBRID POLYMERS*

Supporting Information for

**INFLUENCE OF SUBSTITUENTS IN ARYL GROUPS ON THE STRUCTURE, THERMAL TRANSITIONS AND ELECTORRHEOLOGICAL PROPERTIES OF ZINC BIS(DIARYLPHOSPHATE) HYBRID POLYMERS**

Maciej Dębowski,\* Piotr A. Guńka,\* Konrad Żurawski, Magdalena Zybert, Beata Modzelewska, Andrzej Ostrowski, Janusz Zachara, Zbigniew Florjańczyk

Faculty of Chemistry, Warsaw University of Technology, Noakowskiego 3, 00-664 Warsaw, Poland.

*Inorganic–organic hybrid polymer, metal organophosphate, zinc diarylphosphate, electrorheology*

TABLE OF CONTENT

| Component  | Short Description                                                                                                                                                                                                       | Page |
|------------|-------------------------------------------------------------------------------------------------------------------------------------------------------------------------------------------------------------------------|------|
|            | Details of triaryl phosphate synthesis combined with their selected physicochemical and spectral properties                                                                                                             | S3   |
| Table S1   | Structural details of weak $\pi$ -stacking interactions between <i>p</i> -C <sub>6</sub> H <sub>4</sub> NO <sub>2</sub> groups leading to the formation of layers parallel to (001) lattice plains in compound <b>1</b> | S5   |
| Table S2   | Structural details of C–H...O hydrogen bonds in compound <b>1</b>                                                                                                                                                       | S5   |
| Table S3   | Structural details of $\pi$ -stacking interactions between <i>p</i> -C <sub>6</sub> H <sub>4</sub> NO <sub>2</sub> groups stiffening polymeric rods running along [100] crystallographic direction in compound <b>1</b> | S5   |
| Table S4   | Selected torsion angles connected with conformation of organic substituents around phosphorus centers in compounds <b>1–3</b>                                                                                           | S6   |
| Table S5   | Calculations of bond–valence vectors for zinc and phosphorus centers in compounds <b>1–3</b>                                                                                                                            | S7   |
| Table S6   | Thermogravimetric data of compounds <b>1–3</b> measured in argon                                                                                                                                                        | S8   |
| Figure S1  | FTIR spectrum of <b>1</b>                                                                                                                                                                                               | S9   |
| Figure S2  | <sup>1</sup> H NMR spectrum of compound <b>1</b> recorded in DMSO-d <sub>6</sub> at room temperature                                                                                                                    | S9   |
| Figure S3  | <sup>13</sup> C NMR spectrum of compound <b>1</b> recorded in DMSO-d <sub>6</sub> at room temperature                                                                                                                   | S10  |
| Figure S4  | <sup>31</sup> P NMR spectrum of compound <b>1</b> recorded in DMSO-d <sub>6</sub> at room temperature                                                                                                                   | S11  |
| Figure S5  | The experimental PXRD pattern of compound <b>1</b> recorded at room temperature and PXRD pattern simulated from a single-crystal X-ray measurement at 100 K                                                             | S12  |
| Figure S6  | FTIR spectra of compound <b>2</b> recorded at room temperature: before thermal treatment and after conditioning at 160 °C for 3 h                                                                                       | S13  |
| Figure S7  | <sup>1</sup> H NMR spectrum of compound <b>2</b> recorded in DMSO-d <sub>6</sub> at room temperature                                                                                                                    | S14  |
| Figure S8  | <sup>13</sup> C NMR spectrum of compound <b>2</b> recorded in DMSO-d <sub>6</sub> at room temperature                                                                                                                   | S15  |
| Figure S9  | <sup>31</sup> P NMR spectrum of compound <b>2</b> recorded in DMSO-d <sub>6</sub> at room temperature                                                                                                                   | S16  |
| Figure S10 | The experimental PXRD pattern of compound <b>2</b> recorded at room temperature and PXRD pattern simulated from a single-crystal X-ray measurement                                                                      | S17  |
| Figure S11 | FTIR spectra of compound <b>3</b> recorded at room temperature: before thermal treatment and after conditioning at 160 °C for 10 minutes                                                                                | S18  |

Supporting information for *INFLUENCE OF SUBSTITUENTS IN ARYL GROUPS ON THE STRUCTURE AND THERMAL TRANSITIONS OF ZINC BIS(DIARYLPHOSPHATE) HYBRID POLYMERS*

|            |                                                                                                                                                                                                                                     |     |
|------------|-------------------------------------------------------------------------------------------------------------------------------------------------------------------------------------------------------------------------------------|-----|
| Figure S12 | <sup>1</sup> H NMR spectrum of compound <b>3</b> recorded in DMSO-d <sub>6</sub> at room temperature                                                                                                                                | S19 |
| Figure S13 | <sup>13</sup> C NMR spectrum of compound <b>3</b> recorded in DMSO-d <sub>6</sub> at room temperature                                                                                                                               | S20 |
| Figure S14 | <sup>31</sup> P NMR spectrum of compound <b>3</b> recorded in DMSO-d <sub>6</sub> at room temperature                                                                                                                               | S21 |
| Figure S15 | The simulated and experimental PXRD patterns of compound <b>3</b> recorded at room temperature: before and after 10 minutes of conditioning at 160 °C                                                                               | S22 |
| Figure S16 | Simultaneous thermal analysis (STA) of compound <b>1</b> in argon coupled with quadrupole mass spectrometry (QMS) of the evolved gases                                                                                              | S23 |
| Figure S17 | Simultaneous thermal analysis (STA) of compound <b>2</b> in argon                                                                                                                                                                   | S24 |
| Figure S18 | Simultaneous thermal analysis (STA) of compound <b>3</b> in argon                                                                                                                                                                   | S24 |
| Figure S19 | Thermogravimetric analysis of compound <b>2</b> coupled with quadrupole mass spectrometry (QMS) of the evolved gases                                                                                                                | S25 |
| Figure S20 | Thermogravimetric analysis of compound <b>3</b> coupled with quadrupole mass spectrometry (QMS) of the evolved gases                                                                                                                | S26 |
| Figure S21 | Raman spectra of the solid residues from pyrolysis of compounds <b>1–3</b> in argon                                                                                                                                                 | S27 |
| Figure S22 | PXRD pattern of the solid residue from pyrolysis of compound <b>1</b> in argon with the reflections characteristic of selected zinc condensed phosphate standards                                                                   | S28 |
| Figure S23 | PXRD pattern of the solid residue from pyrolysis of compound <b>2</b> in argon with the reflections characteristic of Zn(PO <sub>3</sub> ) <sub>2</sub> standard                                                                    | S28 |
| Figure S24 | PXRD pattern of the solid residue from pyrolysis of compound <b>3</b> in argon with the reflections characteristic of selected zinc condensed phosphate standards                                                                   | S29 |
| Figure S25 | DSC traces of compound <b>1</b>                                                                                                                                                                                                     | S30 |
| Figure S26 | DSC traces of compound <b>3</b>                                                                                                                                                                                                     | S31 |
| Figure S27 | DSC traces of compound <b>2</b>                                                                                                                                                                                                     | S32 |
| Figure S28 | The experimental PXRD patterns of compound <b>2</b> recorded at room temperature: before thermal treatment, after conditioning at 160 °C for 3 h, and with additional conditioning at 90 °C                                         | S33 |
| Figure S29 | The experimental PXRD patterns recorded at room temperature after conditioning of compound <b>2</b> at 160 °C for 3 h – sample measured: immediately after cooling to room temperature and after 11 h or 4 days at room temperature | S34 |

### Synthesis of phosphoric acid triester containing *p*-C<sub>6</sub>H<sub>4</sub>NO<sub>2</sub> groups

The reaction was carried out in a 250 mL round bottom flask equipped with a dropping funnel, reflux condenser, thermometer and mechanical stirrer. A general procedure was as follows: 4-nitrophenol (21.07 g, 151.5 mmol), benzyltriethylammonium chloride (1,12 g, 4.9 mmol) and 100 mL of dichloromethane were vigorously mixed with a solution of NaOH (6.28 g, 157.0 mmol) in 60 mL H<sub>2</sub>O. Subsequently, the dispersion was cooled to -5-0 °C and POCl<sub>3</sub> (4,5 mL, 48.3 mmol) was added dropwise *via* dropping funnel. The reaction was carried out for another 10 minutes at -5-0 °C, and then slowly warmed up to room temperature. Dichloromethane was removed on a rotary evaporator, followed by dispersing the non-volatile residue in 100 mL of water and separation of its water-insoluble fraction *via* filtration under reduced pressure. In a vacuum oven (*ca.* 1×10<sup>-2</sup> mbar) all volatiles were removed from the resulting raw product, which was furtherly purified by recrystallization from 40 mL of acetone giving 18.20 g of Tris(4-nitrophenyl) phosphate (reaction yield 81%).

**Tris(4-nitrophenyl) phosphate:** Melting temperature: 152.1–153.9 °C. Elemental anal.: C 46.90%, H 3.18% (calculated for C<sub>18</sub>H<sub>12</sub>N<sub>3</sub>O<sub>10</sub>P: C 46.87%, H 2.62%). FT-IR (neat, cm<sup>-1</sup>):\* 3117 (vw), 3080 (vw), 1614 (m), 1588 (m), 1519 (m), 1483 (m), 1371 (vw), 1346 (s), 1304 (m), 1235 (w), 1187 (s), 1154 (s), 1108 (m), 1097 (m), 1010 (w), 963 (s), 948 (vs), 926 (s), 852 (vs), 823 (m), 813 (m), 771 (s), 748 (vs), 736 (m), 683 (s), 642 (s), 627 (m), 616 (s), 601 (m), 546 (s), 532 (m), 517 (s), 494 (m), 466 (s), 445 (vs), and 405 (s). <sup>1</sup>H NMR (500 MHz, DMSO-d<sub>6</sub>, residual solvent): δ<sub>H</sub> 8.40–8.27 (2H, m, 3-H and 5-H), 7.70–7.55 ppm (2 H, m, 2-H and 6-H). <sup>31</sup>P NMR (202 MHz, DMSO-d<sub>6</sub>, 85% H<sub>3</sub>PO<sub>4</sub>): δ<sub>P</sub> -19.91 (s).

\*abbreviations describing FT-IR bands: s – strong, m – medium, w – weak, v – very, sh – shoulder, br – broad.

### Synthesis of phosphoric acid triesters containing *p*-C<sub>6</sub>H<sub>4</sub>OCH<sub>3</sub> or *p*-C<sub>6</sub>H<sub>4</sub>C(O)OC<sub>2</sub>H<sub>5</sub> groups

#### *General procedure*

Triaryl phosphates were obtained in the reaction of phosphorus(V) oxychloride with an appropriate 4-substituted phenol (4-methoxyphenol or ethyl 4-hydroxybenzoate), in the presence of benzyltriethylammonium chloride (**TEBACl**) as a phase transfer catalyst. The reaction was carried out in a 500 mL round bottom flask equipped with a dropping funnel, reflux condenser, thermometer and mechanical stirrer. A general procedure was as follows: phenol (3.1 molar equivalent) and TEBACl (0.03 molar equivalent) were dissolved in 210 mL of dichloromethane at room temperature. To the resulting mixture a 30 wt% aqueous solution of NaOH (3.2 molar equivalent) was slowly added and the mixture was cooled to -5-0 °C. Subsequently, POCl<sub>3</sub> (1 molar equivalent) was added dropwise *via* dropping funnel while maintaining a vigorous mixing. The reaction was kept at -5-0 °C for 30 minutes, slowly warmed up to room temperature and then mixed for another 5 hours. Afterwards, 60 mL of a redistilled water was added dropwise and the vigorous mixing was kept for another 1 h. The resulting two immiscible clear liquids were separated on a separating funnel, and the organic layer was concentrated on a rotary evaporator. The residue was dissolved in 200 mL of ethyl acetate followed by extraction with: 1M HCl<sub>aq</sub> (1 × 100 mL), H<sub>2</sub>O (3 × 100 mL), 10 wt% aqueous solution of NaOH (1 × 100 mL) and H<sub>2</sub>O

(3 × 100 mL). The purified organic layer was dried over anhydrous MgSO<sub>4</sub> and then concentrated on a rotary evaporator at 60 °C giving raw triaryl phosphate as a residue. All volatiles were removed from the latter by heating it for several hours at 60 °C under high vacuum (*ca.* 1×10<sup>-2</sup> mbar). In that manner the following compounds were synthesized:

**Tris(4-methoxyphenyl) phosphate.** Reactants: POCl<sub>3</sub> (6.0 mL, 64.4 mmol), TEBACl (0.46 g, 2.0 mmol), 4-methoxyphenol (24.80 g, 199.8 mmol), NaOH (8.26 g, 206.5 mmol). Product: 22.90 g (yield 85%). Elemental anal.: C 59.74%, H 5.85% (calculated for C<sub>21</sub>H<sub>21</sub>O<sub>7</sub>P: C 60.58%, H 5.08%). FT-IR (neat, cm<sup>-1</sup>):\* 3344 (vw,br), 3115 (vw), 3074 (vw), 3002 (vw), 2954 (vw), 2935 (vw), 2908 (vw), 2836 (vw), 1595 (vw,sh), 1498 (vs), 1463 (w), 1441 (w), 1361 (vW), 1292 (w), 1249 (w), 1218 (w), 1173 (vs), 1102 (w), 1029 (m), 1009 (w), 954 (vs,sh), 827 (s), 799 (w), 732 (w), 719 (w), 701 (w), 637 (w), 561 (w), 515 (m), and 471 (w). <sup>1</sup>H NMR (500 MHz, DMSO-d<sub>6</sub>, residual solvent): δ<sub>H</sub> 7.17–7.12 (2 H, m, 2-H and 6-H), 6.97–6.93 (2 H, m, 3-H and 5-H), 3.73 (3 H, s, Me). <sup>31</sup>P NMR (202 MHz, DMSO-d<sub>6</sub>, 85% H<sub>3</sub>PO<sub>4</sub>): δ<sub>P</sub> -15.81 (s).

**Tris[4-(ethoxycarbonyl)phenyl] phosphate.** Reactants: POCl<sub>3</sub> (6.0 mL, 64.4 mmol), TEBACl (0.44 g, 1.9 mmol), ethyl 4-hydroxybenzoate (33.50 g, 201.6 mmol), NaOH (8.23 g, 205.8 mmol). Product: 30.36 g (yield 87%). Melting temperature: 83.5–84.9 °C. Elemental anal.: C 60.19%, H 5.78% (calculated for C<sub>27</sub>H<sub>27</sub>O<sub>10</sub>P: C 59.78%, H 5.02%). FT-IR (neat, cm<sup>-1</sup>): 3108 (vw), 3064 (vw), 2982 (vw), 2938 (vw), 2903 (vw), 2874 (vw), 1715 (vs), 1599 (m), 1499 (m), 1476 (w), 1465 (w), 1446 (vw), 1414 (w), 1393 (vw), 1365 (w), 1305 (w), 1269 (vs), 1190 (s), 1157 (s), 1108 (m), 1096 (s), 1018 (m), 959 (vs), 931 (s), 859 (m,sh), 792 (w), 769 (s,sh), 691 (m), 636 (m), 624 (m), 598 (w), 547 (m), 533 (m), 506 (m), 483 (w), 468 (m), 445 (w), and 411 (w). <sup>1</sup>H NMR (500 MHz, DMSO-d<sub>6</sub>, residual solvent): δ<sub>H</sub> 8.06–8.01 (2 H, m, 3-H and 5-H), 7.47–7.43 (2 H, m, 2-H and 6-H), 4.30 (2 H, q, *J* = 7.1 Hz, CH<sub>2</sub>CH<sub>3</sub>), 1.30 (3 H, t, *J* = 7.1 Hz, CH<sub>2</sub>CH<sub>3</sub>). <sup>31</sup>P NMR (202 MHz, DMSO-d<sub>6</sub>, 85% H<sub>3</sub>PO<sub>4</sub>): δ<sub>P</sub> -19.13 (s).

\*abbreviations describing FT-IR bands: s – strong, m – medium, w – weak, v – very, sh – shoulder, br – broad.

**Table S1.** Structural details of weak  $\pi$ -stacking interactions between  $p$ -C<sub>6</sub>H<sub>4</sub>NO<sub>2</sub> groups leading to the formation of layers parallel to (001) lattice plains in compound **1**. Distances given in Å and angles in degrees.

| Interaction               | Cg...Cg   | Dihedral angle | Slippage |
|---------------------------|-----------|----------------|----------|
| Cg2...Cg2 <sup>i</sup>    | 4.220(7)  | 11.7(6)        | 2.257    |
| Cg2...Cg2 <sup>ii</sup>   | 4.219(7)  | 11.7(6)        | 2.775    |
| Cg4...Cg4 <sup>i</sup>    | 4.179(7)  | 10.5(6)        | 2.667    |
| Cg4...Cg4 <sup>ii</sup>   | 4.180(7)  | 10.5(6)        | 2.212    |
| Y-X...Cg interaction      | X...Cg    | Y...Cg         | Y-X...Cg |
| N2-O12...Cg2 <sup>i</sup> | 3.996(12) | 3.979(12)      | 80.3(8)  |

i =  $-\frac{1}{2} + x, \frac{1}{2} - y, z$ ; ii =  $\frac{1}{2} + x, \frac{1}{2} - y, z$ . Ring2 = C7C8C9C10C11C12; Ring4 = C19C20C21C22C23C24

**Table S2.** Structural details of C-H...O hydrogen bonds in compound **1**. Distances given in Å and angles in degrees.

| Interaction                | H...O | C...O     | C-H...O |
|----------------------------|-------|-----------|---------|
| C5-H5...O12 <sup>i</sup>   | 2.53  | 3.204(17) | 128     |
| C17-H17...O15 <sup>i</sup> | 2.60  | 3.249(16) | 126     |
| C2-H2...O13 <sup>iii</sup> | 2.51  | 3.163(16) | 126     |
| C9-H9...O14 <sup>iv</sup>  | 2.51  | 3.335(18) | 145     |
| C23-H23...O10 <sup>v</sup> | 2.33  | 3.300(17) | 151     |

i =  $-\frac{1}{2} + x, \frac{1}{2} - y, z$ ; iii =  $\frac{1}{2} - x, -\frac{1}{2} + y, \frac{1}{2} + z$ ; iv =  $-x, 1 - y, \frac{1}{2} + z$ ; v =  $\frac{1}{2} - x, -\frac{1}{2} + y, -\frac{1}{2} + z$ .

**Table S3.** Structural details of  $\pi$ -stacking interactions between  $p$ -C<sub>6</sub>H<sub>4</sub>NO<sub>2</sub> groups stiffening polymeric rods running along [100] crystallographic direction in compound **1**. Distances given in Å and angles in degrees.

| Interaction              | Cg...Cg  | Dihedral angle | Slippage |
|--------------------------|----------|----------------|----------|
| Cg1...Cg1 <sup>vi</sup>  | 3.802(6) | 11.3(5)        | 1.415    |
| Cg1...Cg1 <sup>vii</sup> | 3.801(6) | 11.3(5)        | 1.154    |
| Cg3...Cg3 <sup>vi</sup>  | 3.842(7) | 11.1(6)        | 1.346    |
| Cg3...Cg3 <sup>vii</sup> | 3.841(7) | 11.1(6)        | 1.675    |

vi =  $-\frac{1}{2} + x, 1.5 - y, z$ ; vii =  $\frac{1}{2} + x, 1.5 - y, z$ . Ring1 = C1C2C3C4C5C6; Ring3 = C13C14C15C16C17C18

**Table S4.** Selected torsion angles connected with conformation of organic substituents around phosphorus centers in compounds **1–3**.

| Compound | Bond           | Torsion angle (°) | Conformation type <sup>a</sup> |
|----------|----------------|-------------------|--------------------------------|
| <b>1</b> | O7–P1–O8–C19   | -66.3(10)         | G <sup>-</sup>                 |
|          | O8–P1–O7–C13   | -66.3(9)          | G <sup>-</sup>                 |
|          | O3–P2–O4–C7    | -68.3(10)         | G <sup>-</sup>                 |
|          | O4–P2–O3–C1    | -64.2(9)          | G <sup>-</sup>                 |
| <b>2</b> | O14–P3–O13–C29 | -59.18(16)        | G <sup>-</sup>                 |
|          | O13–P3–O14–C36 | -73.59(14)        | G <sup>-</sup>                 |
|          | O9–P1–O10–C8   | 59.38(14)         | G <sup>+</sup>                 |
|          | O10–P1–O9–C1   | 60.43(12)         | G <sup>+</sup>                 |
|          | O12–P2–O11–C15 | 65.99(12)         | G <sup>+</sup>                 |
|          | O11–P2–O12–C22 | 54.75(12)         | G <sup>+</sup>                 |
|          | O15–P4–O16–C50 | 172.4(4)          | T                              |
|          | O16–P4–O15–C43 | -68.92(14)        | G <sup>-</sup>                 |
| <b>3</b> | O3–P1–O4–C1    | -57.98(17)        | G <sup>-</sup>                 |
|          | O4–P1–O3–C11   | -64.26(17)        | G <sup>-</sup>                 |
|          | O8–P2–O7–C21   | -66.45(15)        | G <sup>-</sup>                 |
|          | O7–P2–O8–C31   | 154.73(16)        | T                              |

<sup>a</sup> symbol of the conformational arrangement in accordance with IUPAC recommendations.<sup>1</sup>

#### References

1. IUPAC Compendium of Chemical Terminology (the "Gold Book"), <https://goldbook.iupac.org/terms/view/T06406>, (accessed January 2022).

### Calculations of bond–valence vectors for zinc and phosphorus centers in compounds 1–3

Bond valences were calculated using the most widely used equation describing the relationship between the bond length ( $d_{ij}$ ) between the  $i$ -th and  $j$ -th atoms and the valence of this bond ( $s_{ij}$ ):<sup>1</sup>

$$s_{ij} = \exp[(r_{ij} - d_{ij}) \times b^{-1}] \quad (S1)$$

where  $r_{ij}$  and  $b$  are empirically determined constants for the given  $i$ - $j$  bond.  $r_{ij}$  is equal to the length of a conceptual bond of a unit valence, whereas the parameter  $b$  is generally treated as a ‘universal’ constant, often taken to be 0.37 Å.<sup>1,2</sup> The following parameters were used in the calculations:  $r_{PO} = 1.617$  Å ( $b = 0.37$  Å),<sup>3</sup> and  $r_{ZnO} = 1.704$  Å ( $b = 0.37$  Å),<sup>3</sup> together with the experimental  $d_{ij}$  values derived from a single-crystal X-ray analysis of compounds 1–3.

According to the bond–valence vector model,<sup>4</sup> the bond between the coordination center  $i$  and the more electronegative ligating atom  $j$  of  $s_{ij}$  valence can be represented by the bond–valence vector  $\mathbf{v}_{ij}$  directed from  $i$  to  $j$  with a length defined by the following equation:

$$|\mathbf{v}_{ij}| = s_{ij} \times [1 - (s_{ij} \times Q_i^{-1})] \quad (S2)$$

where  $Q_i$  is the charge in the core of the central  $i$ -th atom. The lengths of the individual bond–valence vectors ( $|\mathbf{v}_{ZnO}|$  and  $|\mathbf{v}_{PO}|$ ) were calculated by setting the zinc core charge  $Q_{Zn} = 2$  and the phosphorus core charge  $Q_P = 5$ .

The bond–valence sums ( $S_i$ ) and lengths of the resultant bond–valence vectors ( $|\mathbf{v}_i|$ ) for each coordination centers  $i$  connected to the ligating oxygen atoms  $j$  were calculated according to the following equations:

$$S_i = \sum_j s_{ij} \quad (S3)$$

$$\mathbf{v}_i = \sum_j \mathbf{v}_{ij} \quad (S4)$$

$$|\mathbf{v}_i| = (\mathbf{v}_i \cdot \mathbf{v}_i)^{0.5} \quad (S5)$$

**Table S5.** Bond–valence sum ( $S_i$ ) and length of the resultant bond–valence vector  $|\mathbf{v}_i|$  for each crystallographically independent zinc or phosphorus coordination center in compounds 1–3 and zinc bis(diphenylphosphate) (**ZnDPhP**)

| Compound                  | Atom | $S_P$ | $ \mathbf{v}_P $ (v.u.) <sup>a</sup> | Atom | $S_{Zn}$ | $ \mathbf{v}_{Zn} $ (v.u.) <sup>a</sup> |
|---------------------------|------|-------|--------------------------------------|------|----------|-----------------------------------------|
| <b>1</b>                  | P1   | 4.88  | 0.033                                | Zn1  | 2.08     | 0.074                                   |
|                           | P2   | 4.98  | 0.026                                |      |          |                                         |
| <b>2</b>                  | P1   | 5.03  | 0.010                                | Zn1  | 2.18     | 0.029                                   |
|                           | P2   | 5.03  | 0.042                                | Zn2  | 2.17     | 0.041                                   |
|                           | P3   | 5.05  | 0.024                                |      |          |                                         |
|                           | P4   | 5.05  | 0.075                                |      |          |                                         |
| <b>3</b>                  | P1   | 5.10  | 0.030                                | Zn1  | 2.24     | 0.056                                   |
|                           | P2   | 5.07  | 0.051                                |      |          |                                         |
| <b>ZnDPhP<sup>b</sup></b> | P1   | 5.02  | 0.062                                | Zn1  | 2.18     | 0.034                                   |
|                           | P2   | 4.97  | 0.057                                |      |          |                                         |

<sup>a</sup> valence units. <sup>b</sup> data from reference 5

#### References

1. I. D. Brown and D. Altermatt, *Acta Crystallogr., Sect. B: Struct. Sci.*, 1985, **41**, 244–247.
2. N. E. Brese and M. O’Keeffe, *Acta Crystallogr., Sect. B: Struct. Sci.*, 1991, **47**, 192–197.

- I. D. Brown, Accumulated Table of Bond Valence Parameters, [https://www.iucr.org/\\_data/assets/file/0011/150779/bvparm2020.cif](https://www.iucr.org/_data/assets/file/0011/150779/bvparm2020.cif) (accessed Dec 6, 2019).
- J. Zachara, *Inorg. Chem.*, 2007, **46**, 9760–9767.
- M. Dębowski, Z. Florjańczyk, A. Ostrowski, P. A. Guńka, J. Zachara, A. Krztoń–Maziopa, J. Chazarkiewicz, A. Iuliano and A. Plichta, *RSC Adv.*, 2021, **11**, 7873–7885.

**Table S6.** Thermogravimetric data of compounds **1–3** measured in argon

| Compound | Type of process <sup>a</sup> | Degradation step, n <sup>b</sup> | $T_{b,n}^c$ (°C) | $T_{98\%}^d$ (°C) | $T_{95\%}^d$ (°C) | $T_{onset,n}^e$ (°C) | $T_{max,n}^f$ (°C) | $T_{endset,n}^e$ (°C) | $\Delta m^g$ (wt%) | $m_{800}^h$ (wt%) |
|----------|------------------------------|----------------------------------|------------------|-------------------|-------------------|----------------------|--------------------|-----------------------|--------------------|-------------------|
| <b>1</b> | one-step                     | 1                                | 274.0            | 326.5             | 363.1             | 382.4                | 382.5              | 382.7                 | 51.55              | 40.45             |
| <b>2</b> | multistep                    | 1                                | 288.0            | 337.9             | 357.1             | 355.3                | 369.3              | 556.1 <sup>i</sup>    | 44.63              | 51.88             |
| <b>3</b> | two-step                     | 1                                | 264.0            | 283.5             | 302.2             | 316.4                | 324.4              | 327.3                 | 35.28              | 41.79             |
|          |                              | 2                                | 449.0            | –                 | –                 | 485.1                | 501.3              | 522.6                 | 14.24              |                   |

<sup>a</sup> Refers to the number of steps in which thermal decomposition occurred, e.g. two-step – two well-separated steps of weight loss, multistep – many steps of weight loss, some overlapping with each other. <sup>b</sup> An individual number ascribed to the respective decomposition region. <sup>c</sup> Temperature of the beginning of weight loss (a bend point on the TG curve for the respective decomposition region denoted with its individual index n). <sup>d</sup>  $T_{98\%}$  and  $T_{95\%}$  denote temperatures at which sample mass reached 98% and 95% of its initial value, respectively. <sup>e</sup>  $T_{onset,n}$  and  $T_{endset,n}$  denote the extrapolated onset and endset temperatures, respectively. <sup>f</sup>  $T_{max,n}$  – temperature at the maximum decomposition rate for the respective decomposition step. <sup>g</sup> Mass variation during the respective decomposition step (as % of the initial sample mass). <sup>h</sup> Residual mass of the sample measured at 800 °C (as % of the initial sample mass).



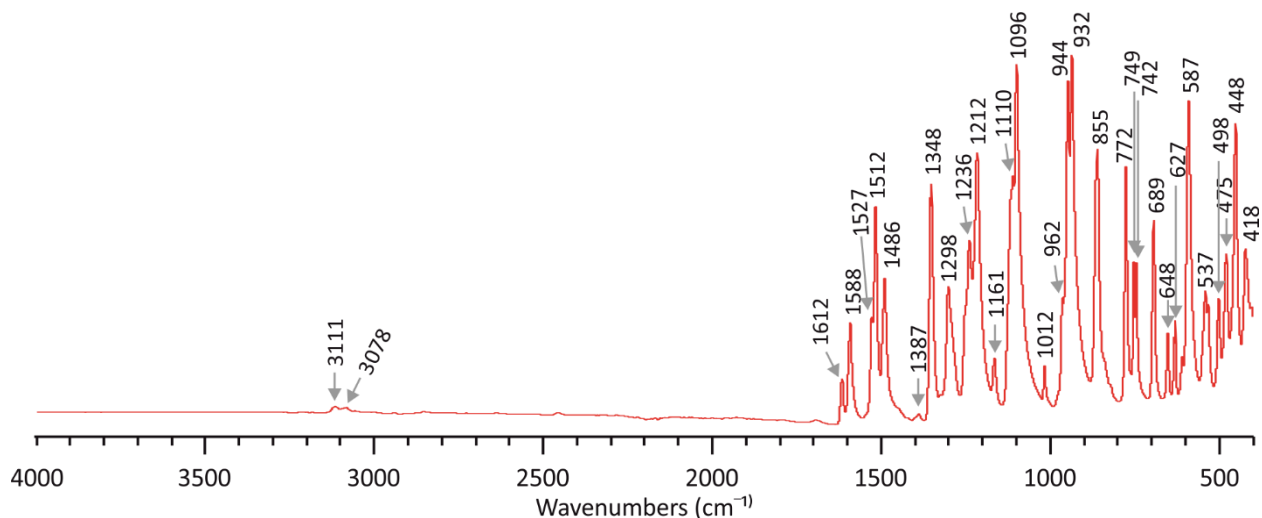

**Figure S1.** FTIR spectrum of compound **1**.

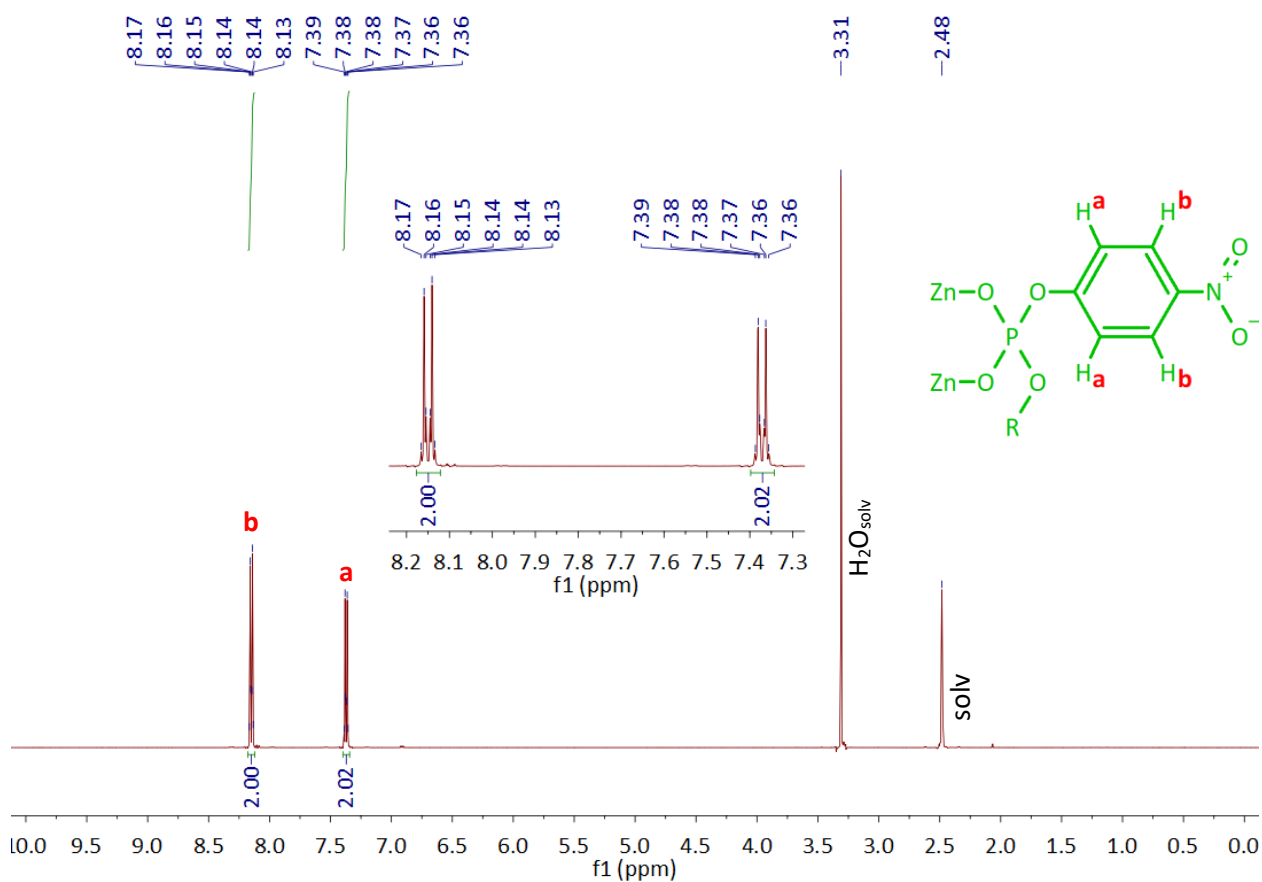

**Figure S2.** <sup>1</sup>H NMR spectrum of compound **1** recorded at room temperature. Sample dissolved in DMSO-d<sub>6</sub>. Abbreviations: H<sub>2</sub>O<sub>solv</sub> – traces of water present in DMSO-d<sub>6</sub>, solv – solvent residual signal.

<sup>1</sup>H NMR (500 MHz; DMSO-d<sub>6</sub>; residual solvent) δ<sub>H</sub> 8.18–8.12 (2 H, m, 3-H and 5-H), 7.40–7.34 (2 H, m, 2-H and 6-H).

Supporting information for *INFLUENCE OF SUBSTITUENTS IN ARYL GROUPS ON THE STRUCTURE AND THERMAL TRANSITIONS OF ZINC BIS(DIARYLPHOSPHATE) HYBRID POLYMERS*

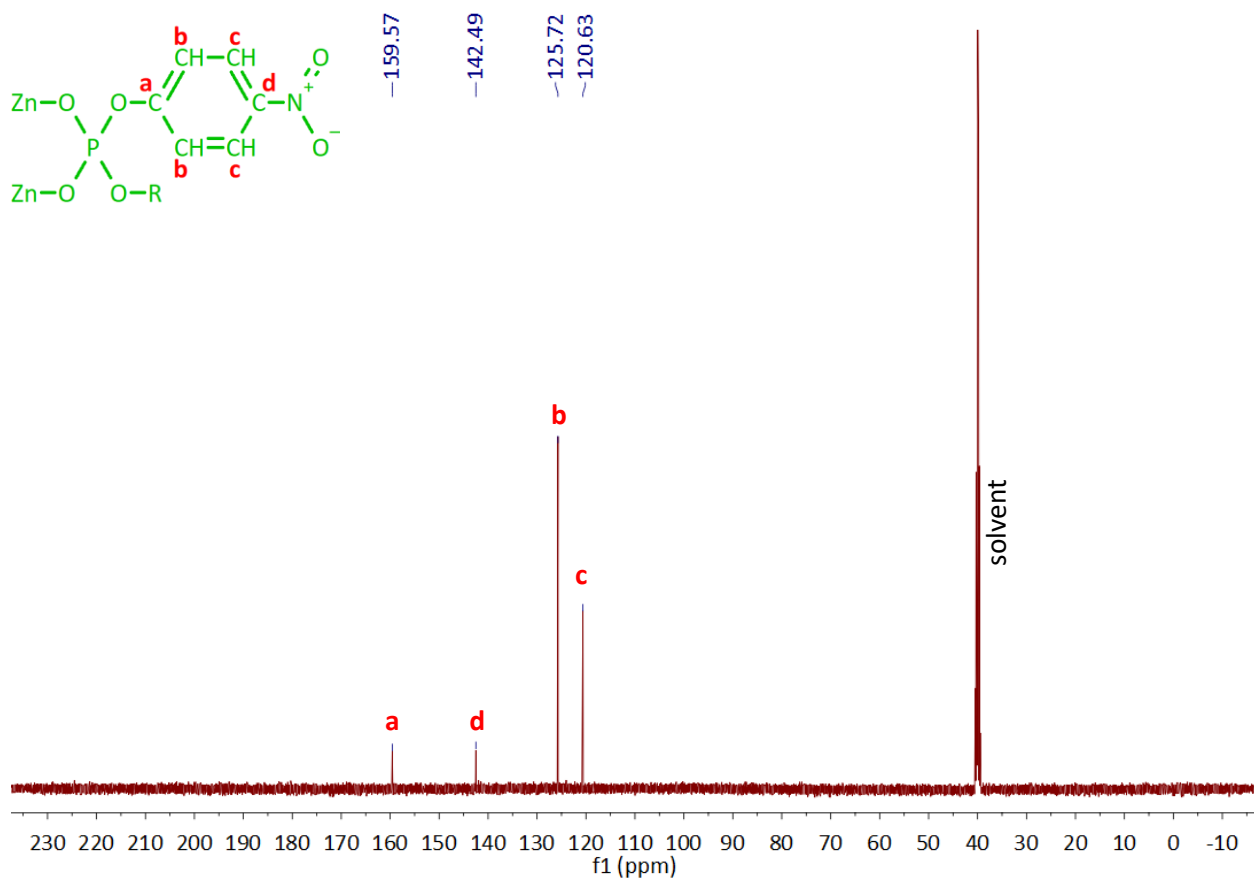

**Figure S3.** <sup>13</sup>C NMR spectrum of compound **1** recorded at room temperature. Sample dissolved in DMSO-d<sub>6</sub>. Solvent residual signal is also indicated.

<sup>13</sup>C NMR (126 MHz; DMSO-d<sub>6</sub>; residual solvent) δ<sub>c</sub> 159.57, 142.49, 125.72, 120.63.

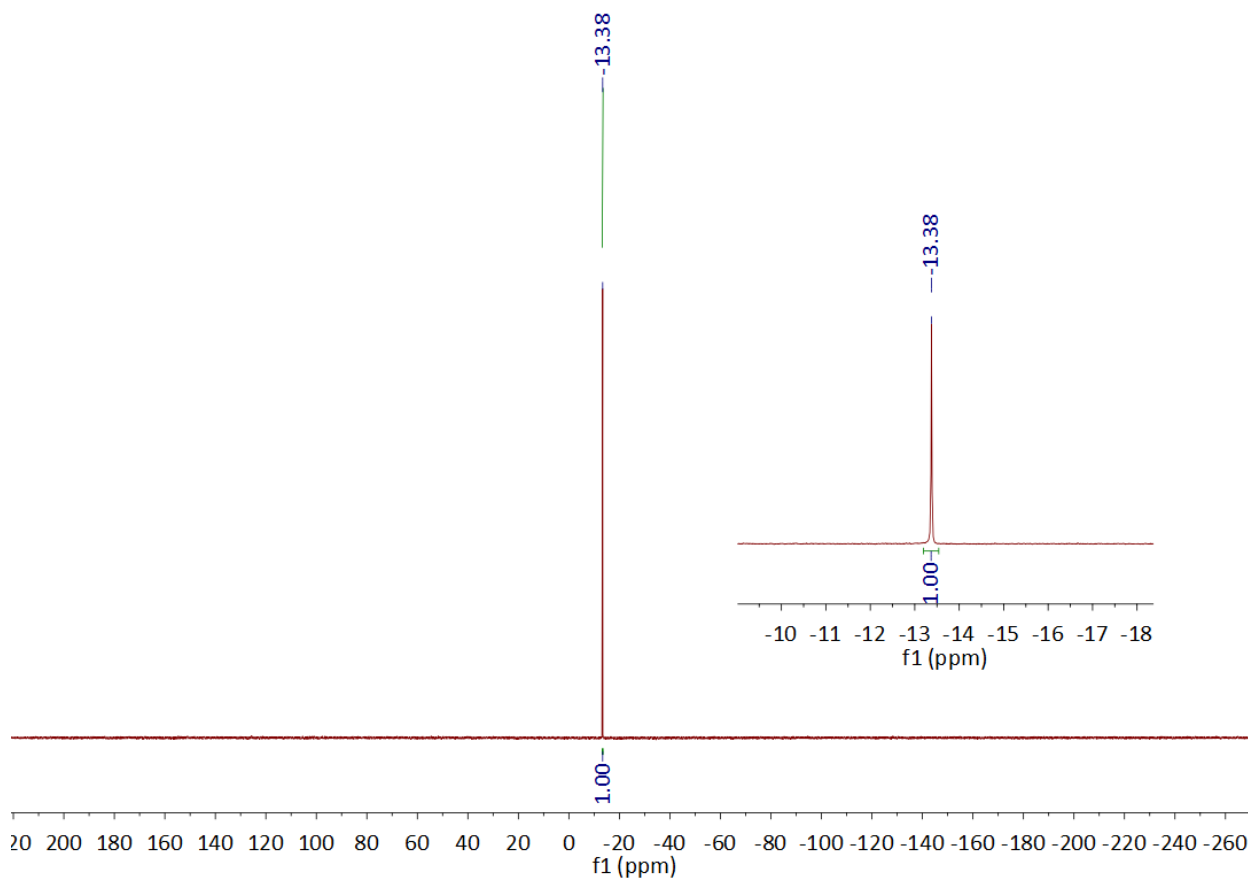

**Figure S4.**  $^{31}\text{P}$  NMR spectrum of compound **1** recorded at room temperature. Sample dissolved in  $\text{DMSO-d}_6$ . The chemical shifts are reported relative to 85%  $\text{H}_3\text{PO}_4$  external standard.

$^{31}\text{P}$  NMR (202 MHz;  $\text{DMSO-d}_6$ ; 85%  $\text{H}_3\text{PO}_4$ )  $\delta_{\text{P}}$  -13.38.

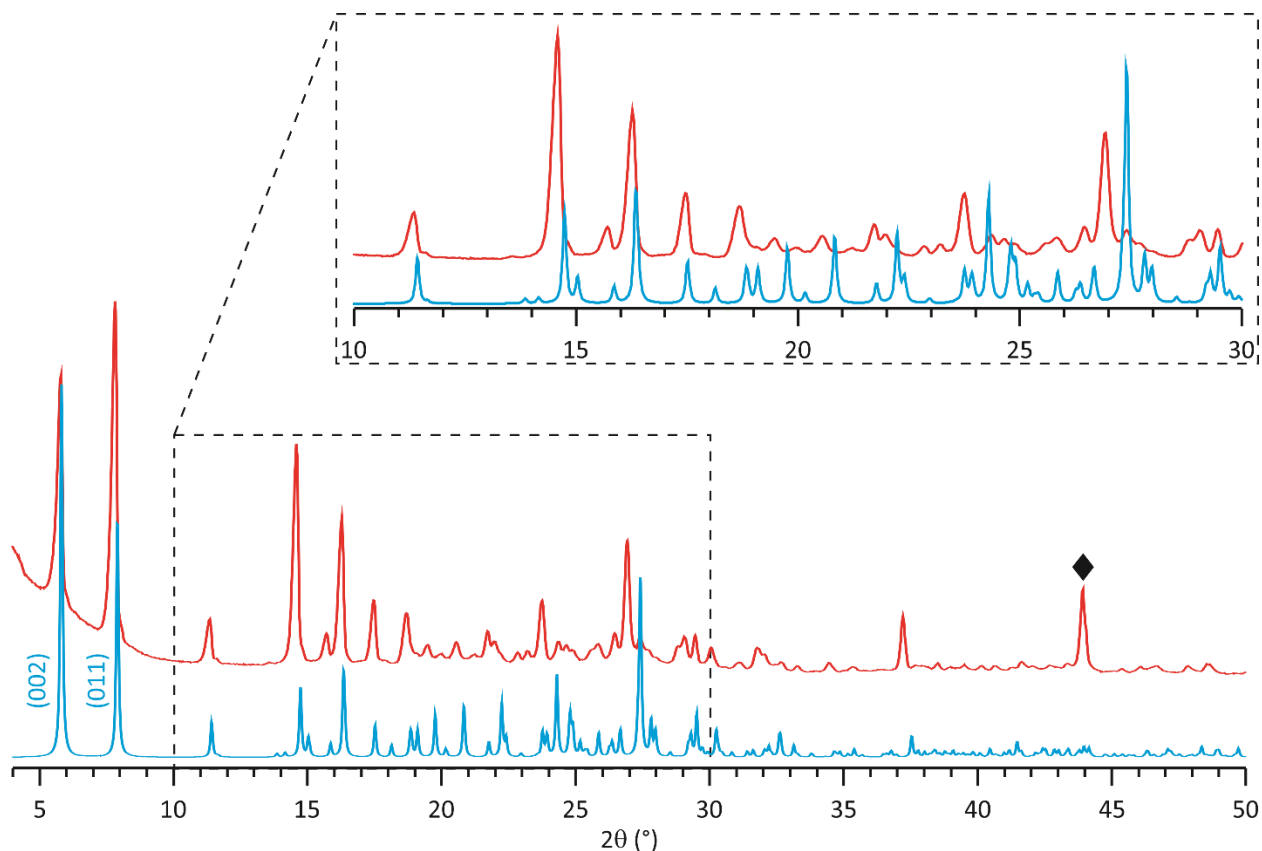

**Figure S5.** The experimental PXRD pattern of compound **1** recorded at room temperature (—) and PXRD pattern simulated from a single-crystal X-ray measurement carried out at 100 K (—). The reflection observed for a polycrystalline sample around 44° (denoted with ♦) results from diamond powder used as an internal standard. Miller indices of two major reflections are denoted. The diffractograms are normalized between 0 and 1.

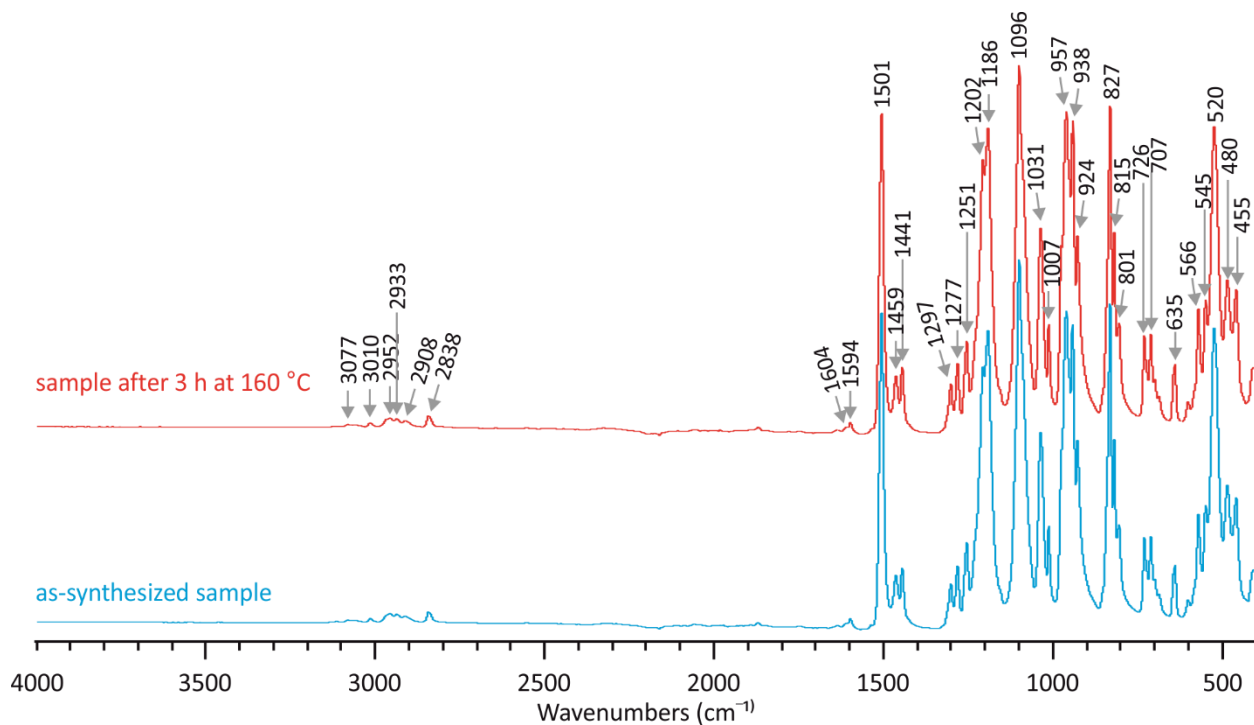

**Figure S6.** FTIR spectra of compound **2** recorded at room temperature: before thermal treatment (—) and after conditioning at 160 °C for 3 h (—).

Supporting information for *INFLUENCE OF SUBSTITUENTS IN ARYL GROUPS ON THE STRUCTURE AND THERMAL TRANSITIONS OF ZINC BIS(DIARYLPHOSPHATE) HYBRID POLYMERS*

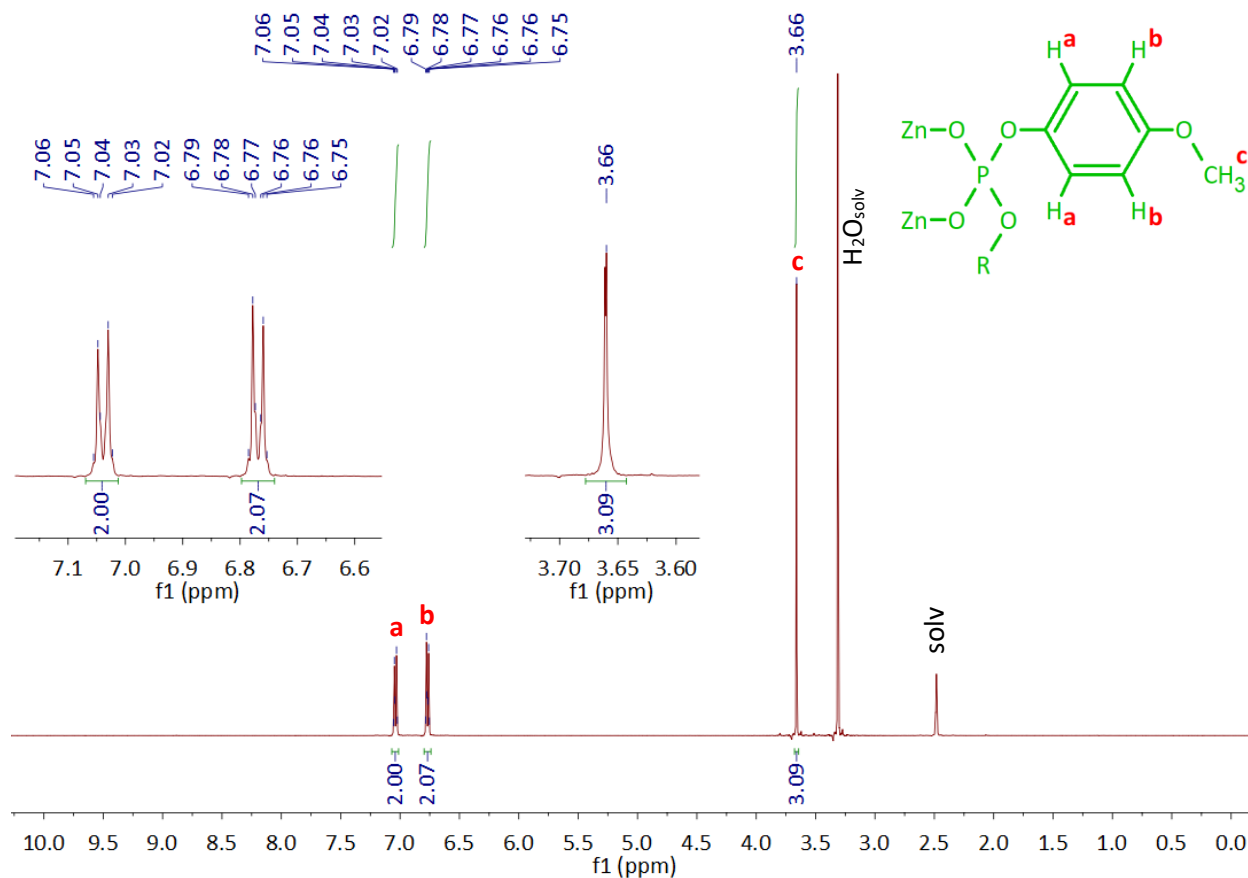

**Figure S7.** <sup>1</sup>H NMR spectrum of compound **2** recorded at room temperature. Sample dissolved in DMSO-d<sub>6</sub>. Abbreviations: H<sub>2</sub>O<sub>solv</sub> – traces of water present in DMSO-d<sub>6</sub>, solv – solvent residual signal.

<sup>1</sup>H NMR (500 MHz; DMSO-d<sub>6</sub>; residual solvent) δ<sub>H</sub> 7.07–7.01 (2 H, m, 2-H and 6-H), 6.80–6.74 (2 H, m, 3-H and 5-H), 3.66 (3H, s, OCH<sub>3</sub>).

Supporting information for *INFLUENCE OF SUBSTITUENTS IN ARYL GROUPS ON THE STRUCTURE AND THERMAL TRANSITIONS OF ZINC BIS(DIARYLPHOSPHATE) HYBRID POLYMERS*

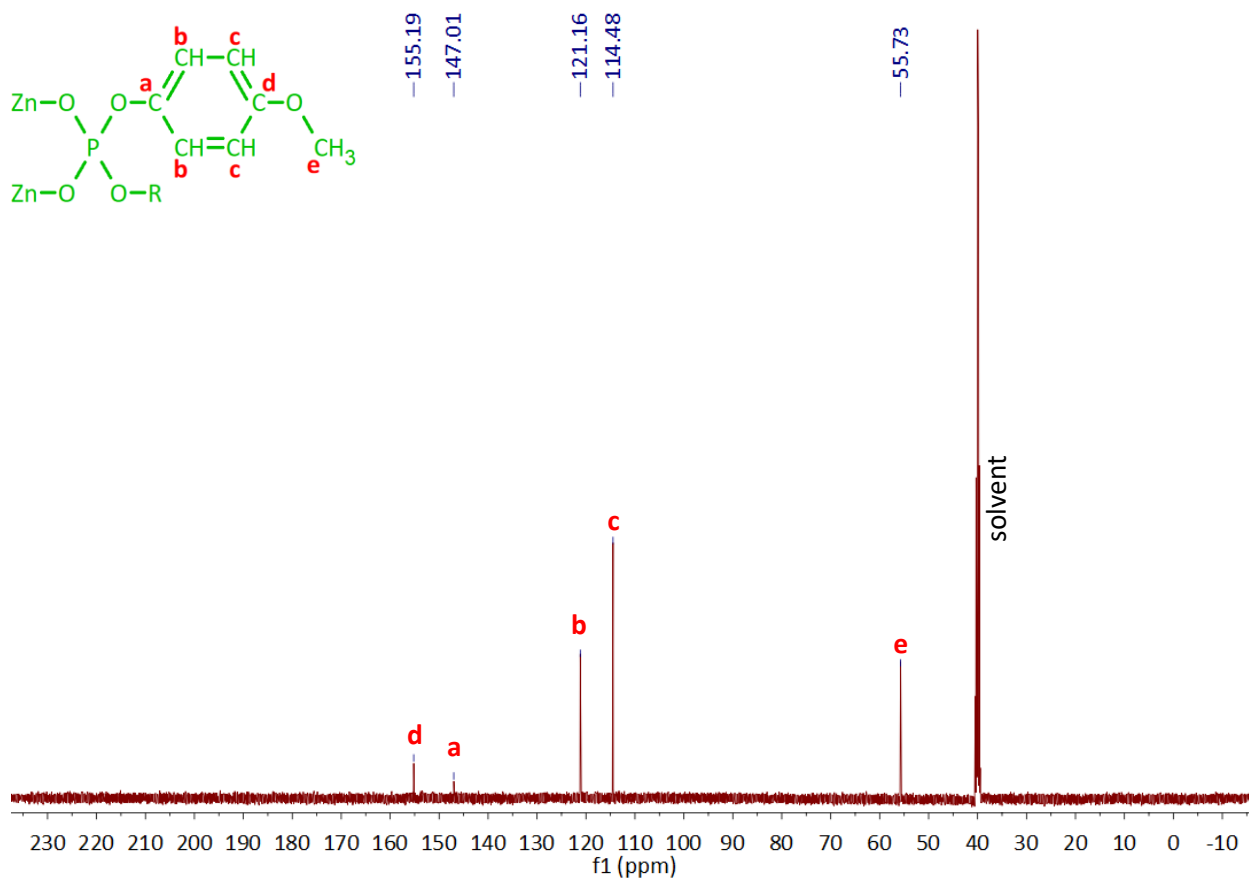

**Figure S8.** <sup>13</sup>C NMR spectrum of compound **2** recorded at room temperature. Sample dissolved in DMSO-d<sub>6</sub>. Solvent residual signal is also indicated.

<sup>13</sup>C NMR (126 MHz; DMSO-d<sub>6</sub>; residual solvent) δ<sub>c</sub> 155.19, 147.01, 121.16, 114.48, 55.73.

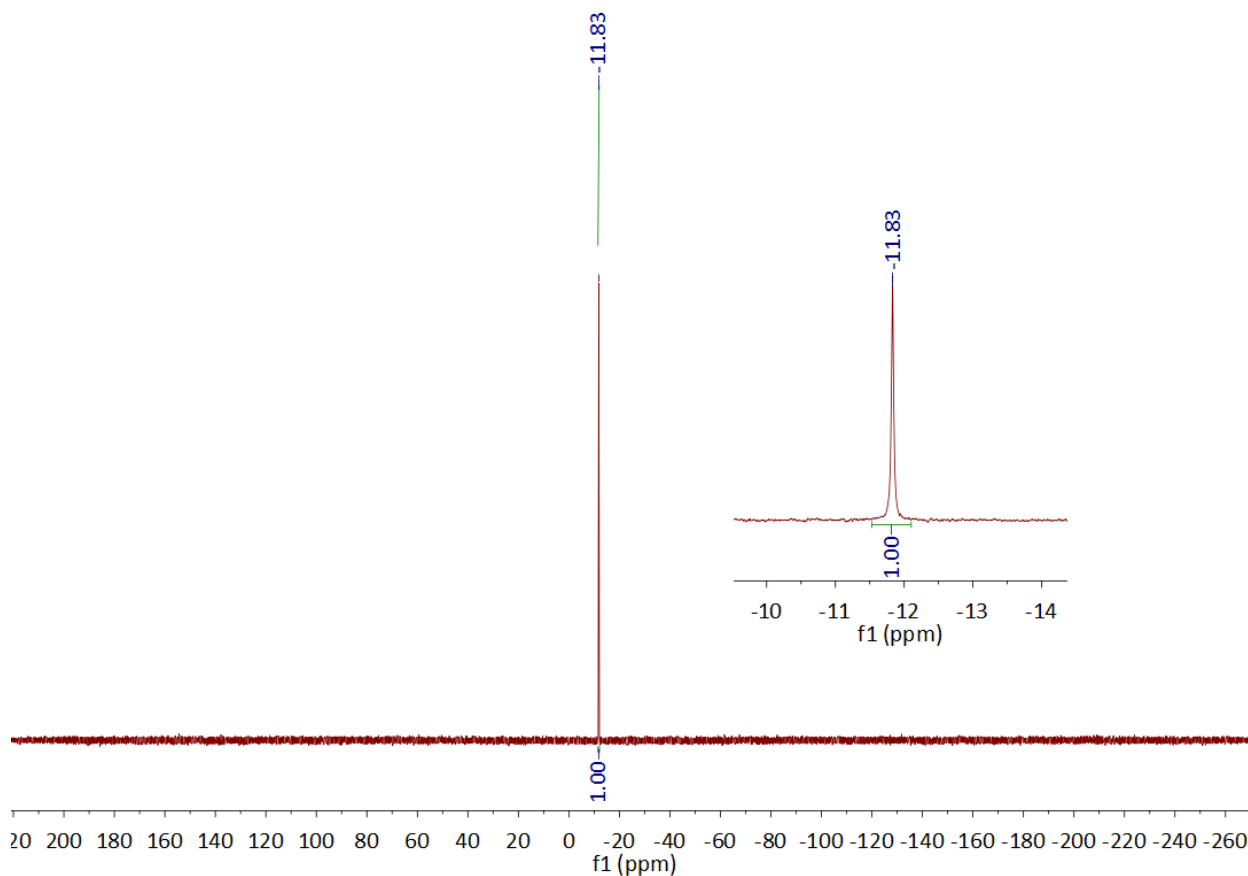

**Figure S9.**  $^{31}\text{P}$  NMR spectrum of compound **2** recorded at room temperature. Sample dissolved in  $\text{DMSO-d}_6$ . The chemical shifts are reported relative to 85%  $\text{H}_3\text{PO}_4$  external standard.

$^{31}\text{P}$  NMR (202 MHz;  $\text{DMSO-d}_6$ ; 85%  $\text{H}_3\text{PO}_4$ )  $\delta_{\text{P}}$  -11.83.



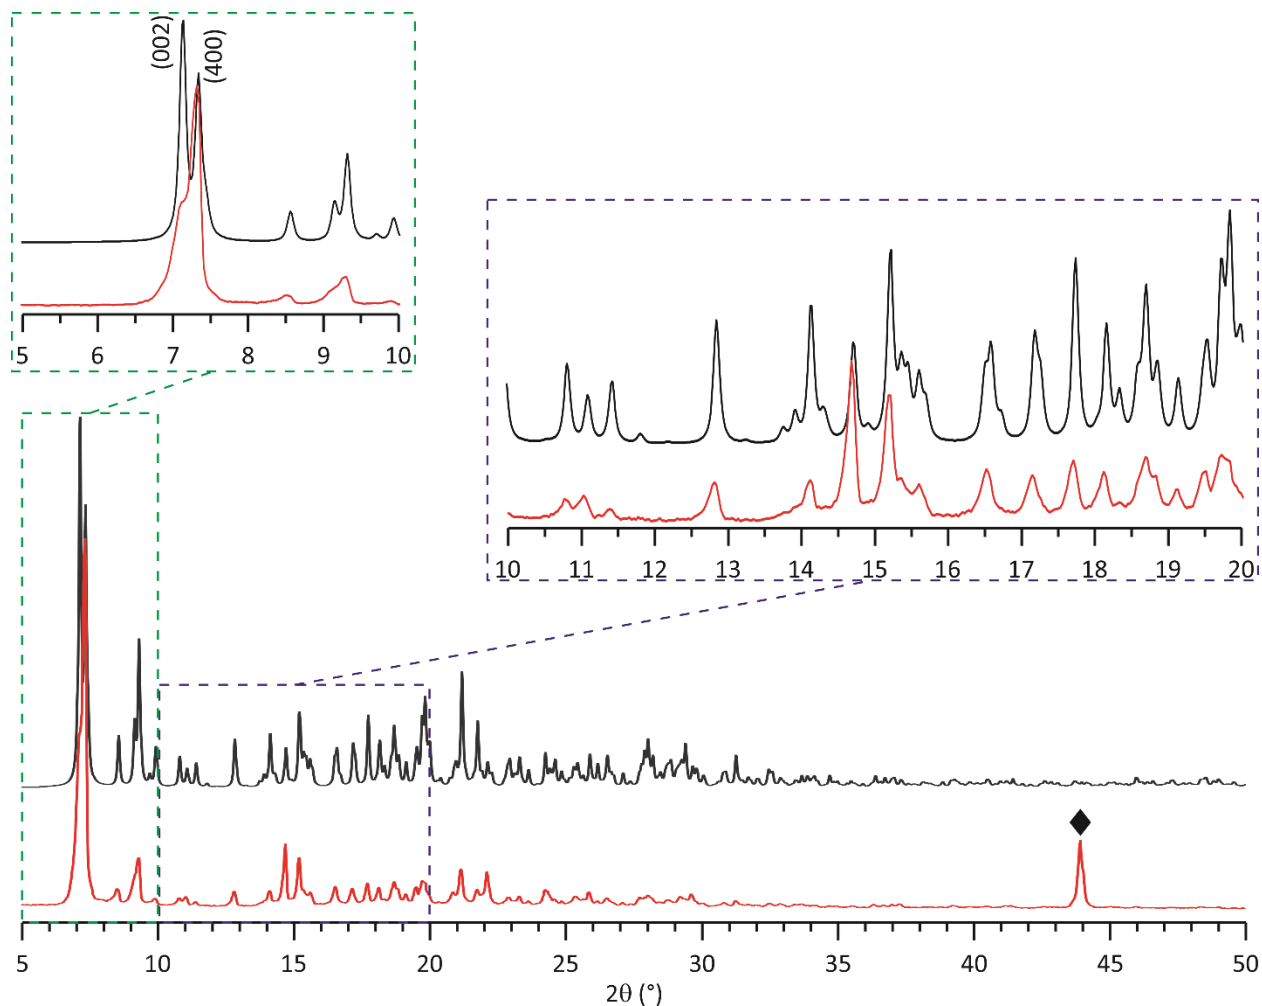

**Figure S10.** The experimental PXRD pattern of compound **2** recorded at room temperature (—) and PXRD pattern simulated from a single-crystal X-ray measurement (—). The reflection observed for a polycrystalline sample around 44° (denoted with ♦) results from diamond powder used as an internal standard. Miller indices of two major reflections are denoted. The diffractograms are normalized between 0 and 1.

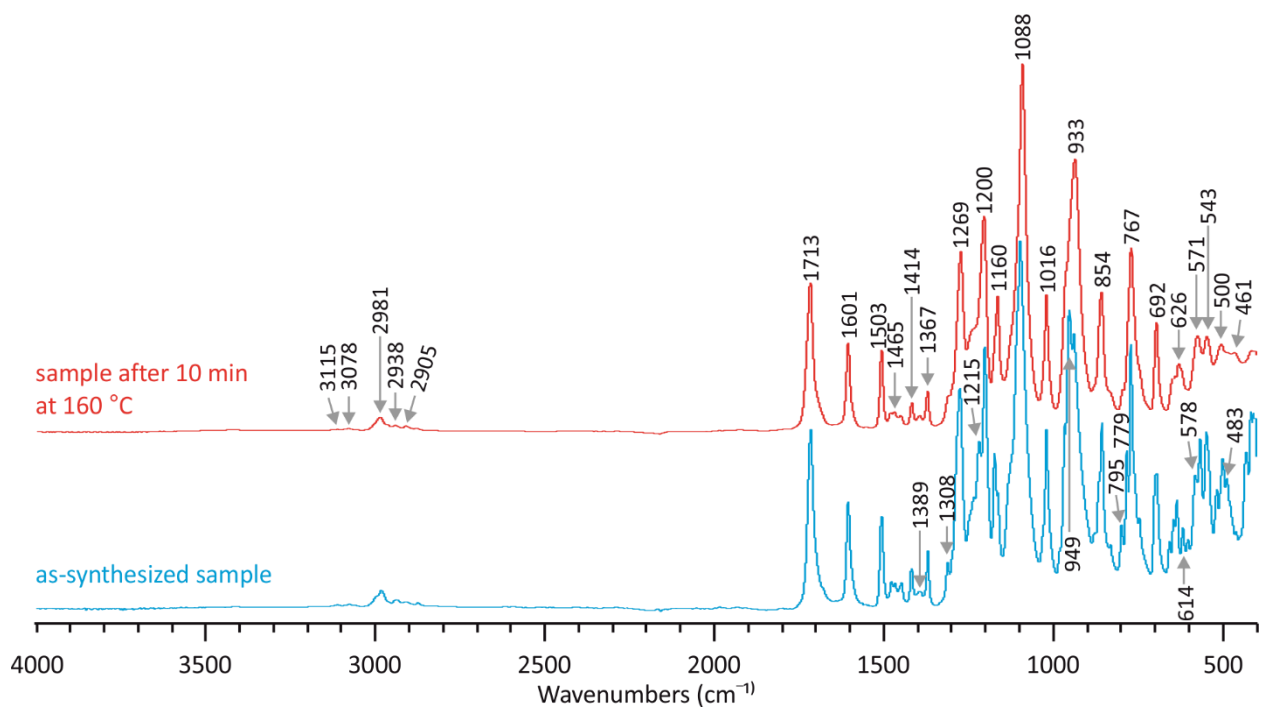

**Figure S11.** FTIR spectra of compound **3** recorded at room temperature: before thermal treatment (—) and after conditioning at 160 °C for 10 minutes (—).

Supporting information for *INFLUENCE OF SUBSTITUENTS IN ARYL GROUPS ON THE STRUCTURE AND THERMAL TRANSITIONS OF ZINC BIS(DIARYLPHOSPHATE) HYBRID POLYMERS*

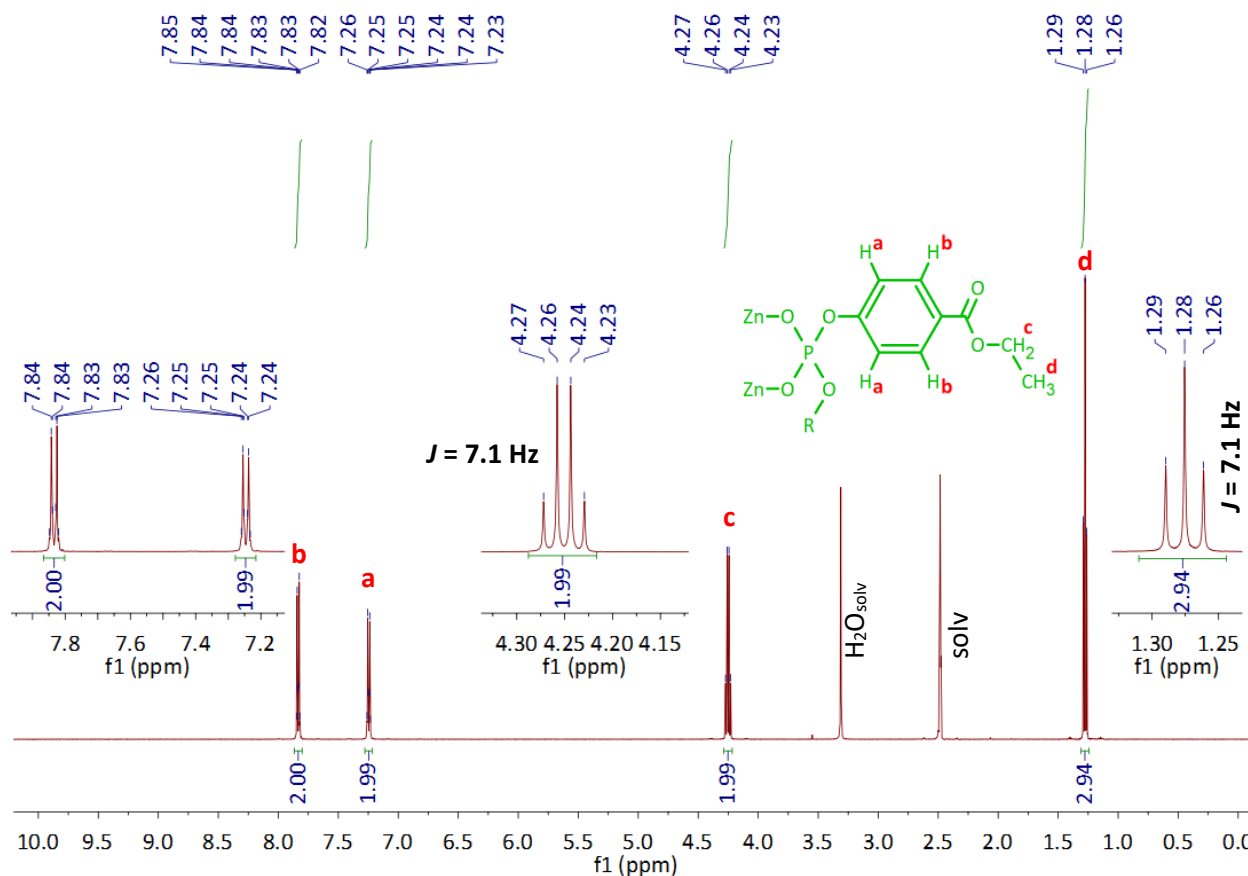

**Figure S12.** <sup>1</sup>H NMR spectrum of compound **3** recorded at room temperature. Sample dissolved in DMSO-d<sub>6</sub>. Abbreviations: H<sub>2</sub>O<sub>solv</sub> – traces of water present in DMSO-d<sub>6</sub>, solv – solvent residual signal.

<sup>1</sup>H NMR (500 MHz; DMSO-d<sub>6</sub>; residual solvent) δ<sub>H</sub> 7.87–7.80 (2 H, m, 3-H and 5-H), 7.28–7.22 (2 H, m, 2-H and 6-H), 4.25 (2 H, q, J = 7.1 Hz, CH<sub>2</sub>CH<sub>3</sub>), 1.28 (3 H, t, J = 7.1 Hz, CH<sub>2</sub>CH<sub>3</sub>)

Supporting information for *INFLUENCE OF SUBSTITUENTS IN ARYL GROUPS ON THE STRUCTURE AND THERMAL TRANSITIONS OF ZINC BIS(DIARYLPHOSPHATE) HYBRID POLYMERS*

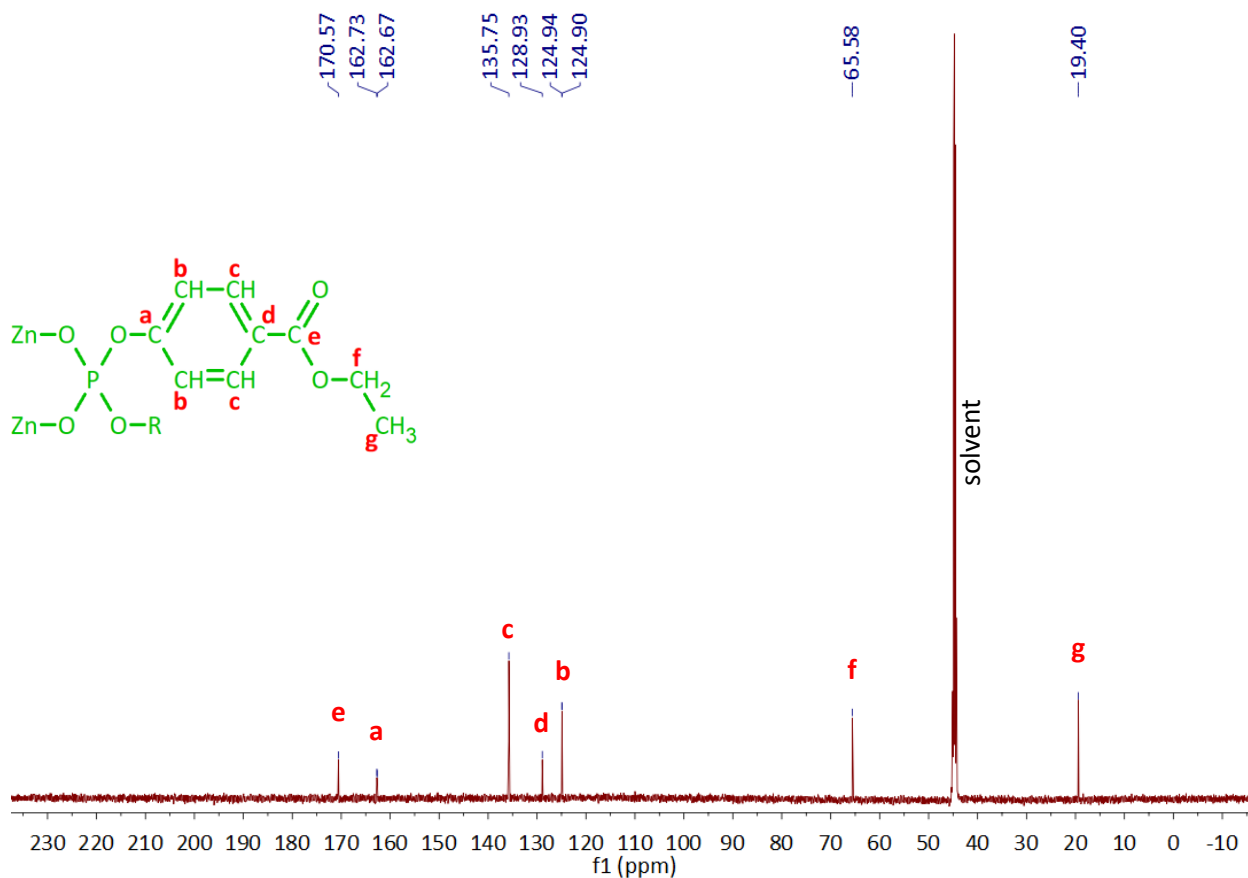

**Figure S13.** <sup>13</sup>C NMR spectrum of compound **3** recorded at room temperature. Sample dissolved in DMSO-d<sub>6</sub>. Solvent residual signal is also indicated.

<sup>13</sup>C NMR (126 MHz; DMSO-d<sub>6</sub>; residual solvent) δ<sub>c</sub> 170.57, 162.70 (d, *J* = 6.6 Hz), 135.75, 128.93, 124.94, 124.90, 65.58, 19.40.

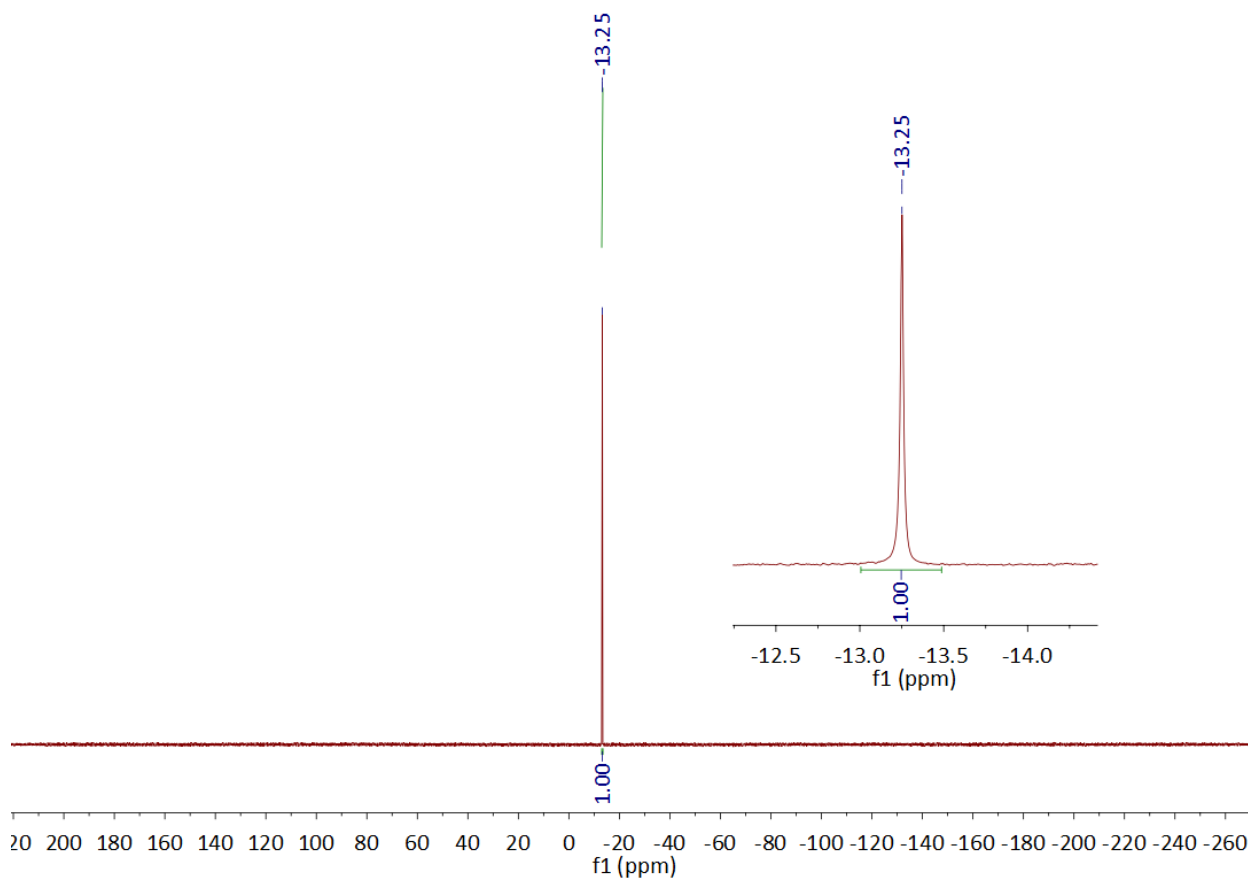

**Figure S14.**  $^{31}\text{P}$  NMR spectrum of compound **3** recorded at room temperature. Sample dissolved in  $\text{DMSO-d}_6$ . The chemical shifts are reported relative to 85%  $\text{H}_3\text{PO}_4$  external standard.

$^{31}\text{P}$  NMR (202 MHz;  $\text{DMSO-d}_6$ ; 85%  $\text{H}_3\text{PO}_4$ )  $\delta_{\text{P}}$  -13.25.

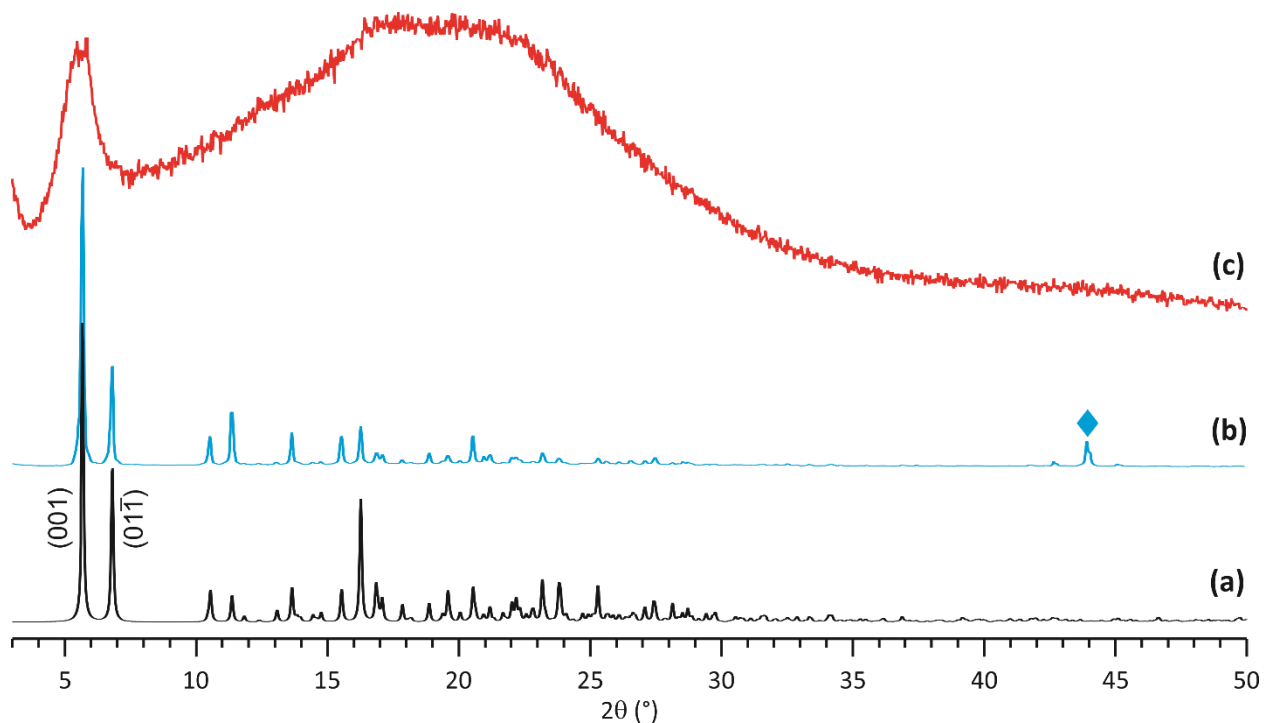

**Figure S15.** The simulated (a, —) and experimental PXRD patterns of compound **3** recorded at room temperature: before (b, —), and after 10 minutes of conditioning at 160 °C (c, —). The reflection around 44° (denoted with ♦) results from diamond powder used as an internal standard. Miller indices of two major reflections are denoted. The diffractograms were normalized between 0 and 1.

Supporting information for *INFLUENCE OF SUBSTITUENTS IN ARYL GROUPS ON THE STRUCTURE AND THERMAL TRANSITIONS OF ZINC BIS(DIARYLPHOSPHATE) HYBRID POLYMERS*

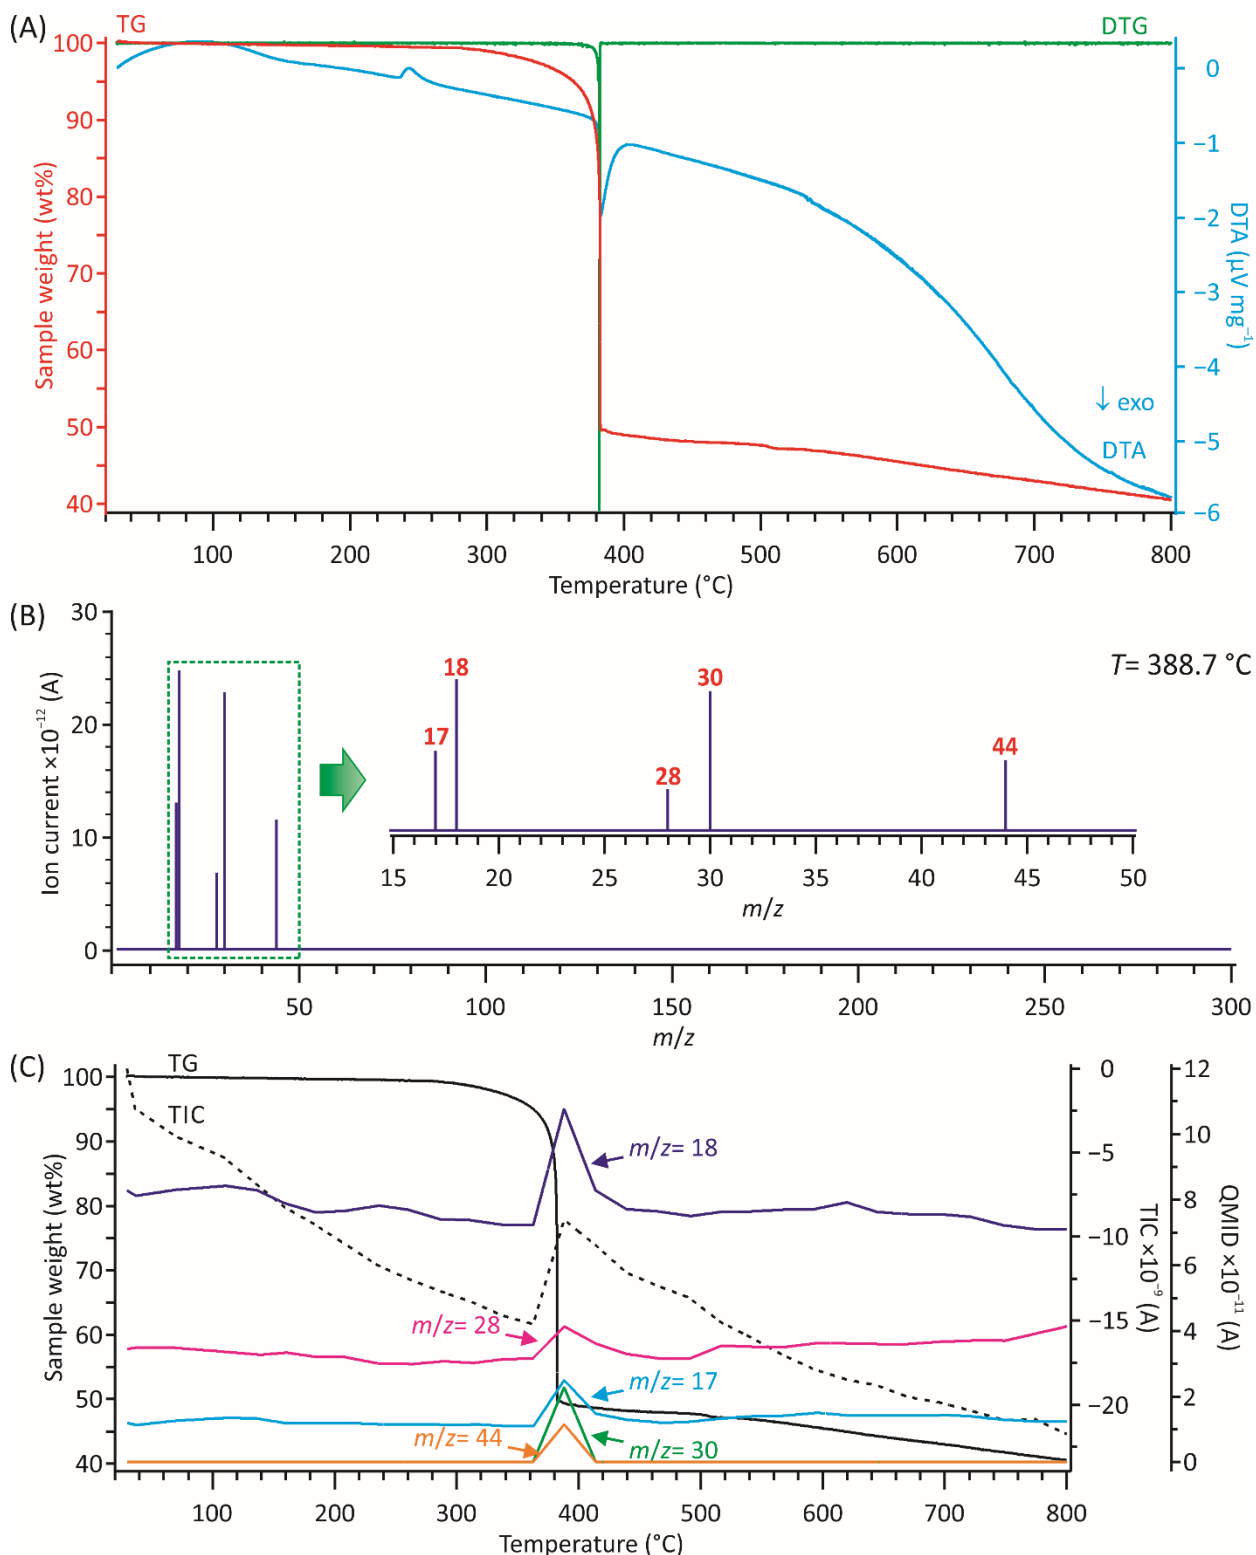

**Figure S16.** Simultaneous thermal analysis (STA) of compound **1** in argon (heating rate  $5^{\circ}\text{C min}^{-1}$ ) coupled with quadrupole mass spectrometry (QMS) of the evolved gases: (A) TG (—), 1<sup>st</sup> derivative of TG (DTG, —) and DTA (—) curves, (B) QMS spectrum obtained at  $388.7^{\circ}\text{C}$ , (C) TG (—), Total Ion Current (TIC, black, dashed line) and QMS curves (coloured lines) for the ions with selected values of  $m/z$ .

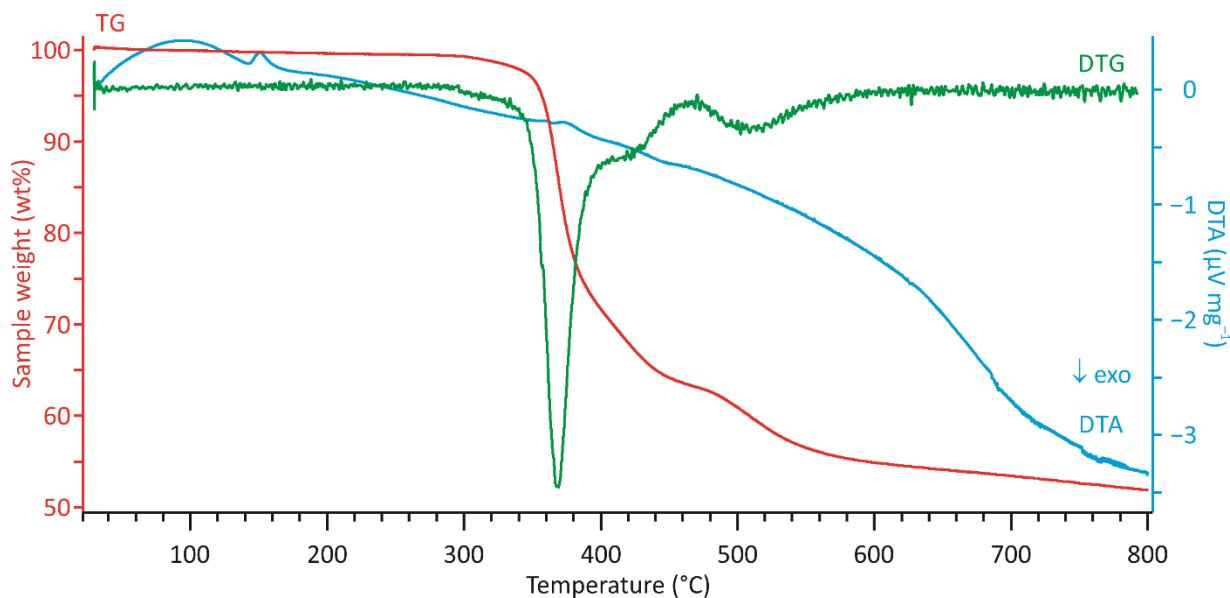

**Figure S17.** Simultaneous thermal analysis (STA) of compound **2** in argon (heating rate 5 °C min<sup>-1</sup>): TG curve (—), 1<sup>st</sup> derivative of TG curve (DTG, —), and DTA curve (—).

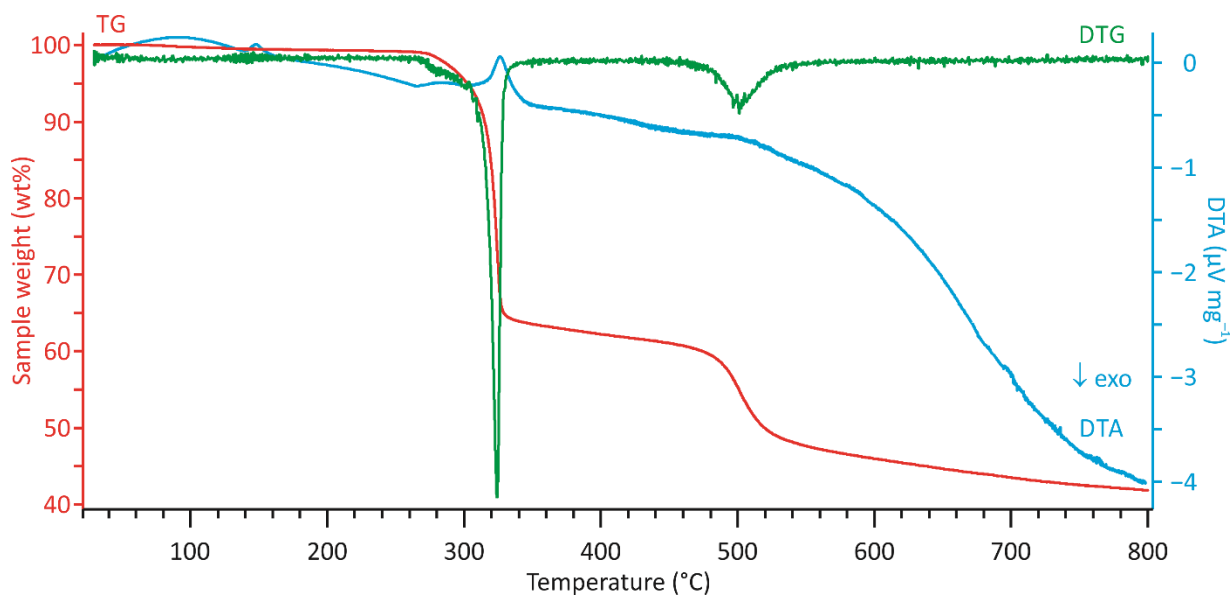

**Figure S18.** Simultaneous thermal analysis (STA) of compound **3** in argon (heating rate 5 °C min<sup>-1</sup>): TG curve (—), 1<sup>st</sup> derivative of TG curve (DTG, —), and DTA curve (—).



Supporting information for *INFLUENCE OF SUBSTITUENTS IN ARYL GROUPS ON THE STRUCTURE AND THERMAL TRANSITIONS OF ZINC BIS(DIARYLPHOSPHATE) HYBRID POLYMERS*

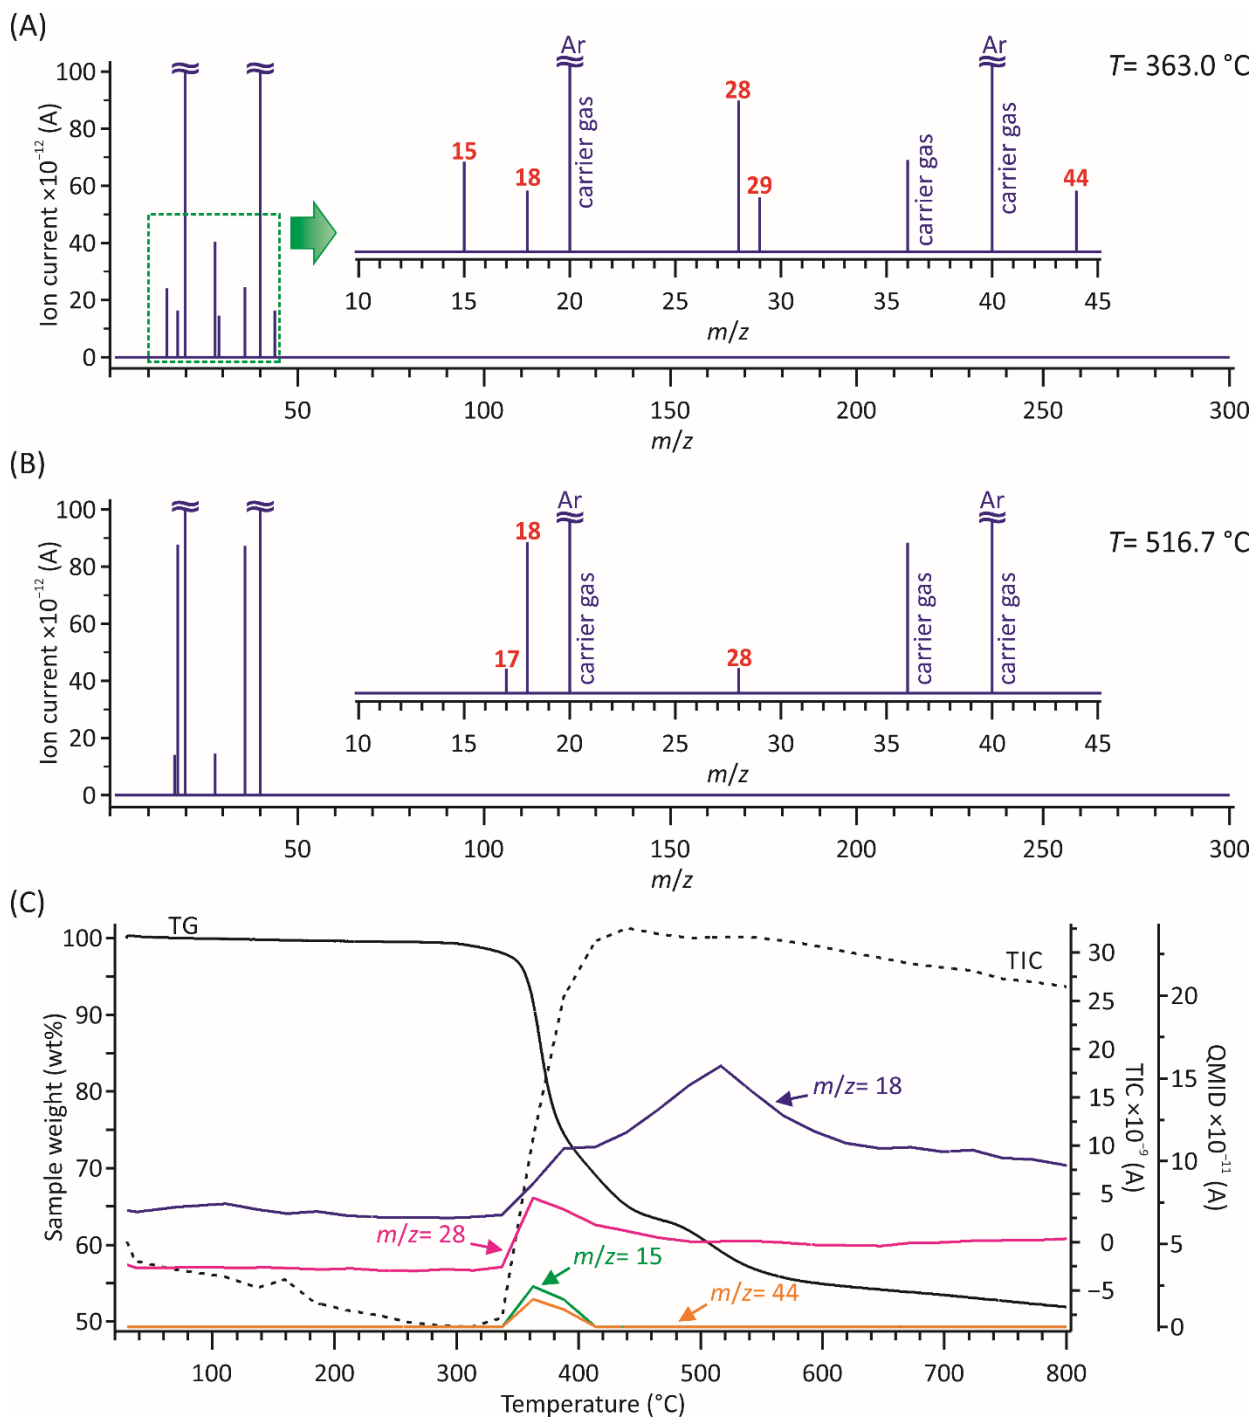

**Figure S19.** Simultaneous thermal analysis (STA) of compound **2** in argon (heating rate 5 °C min<sup>-1</sup>) coupled with quadrupole mass spectrometry (QMS) of the evolved gases: (A) QMS spectrum obtained at 363.0 °C, (B) QMS spectrum obtained at 516.7 °C, (C) TG (black, solid line), Total Ion Current (TIC, black, dashed line) and QMS curves (coloured lines) for the ions with selected values of  $m/z$ .

Supporting information for *INFLUENCE OF SUBSTITUENTS IN ARYL GROUPS ON THE STRUCTURE AND THERMAL TRANSITIONS OF ZINC BIS(DIARYLPHOSPHATE) HYBRID POLYMERS*

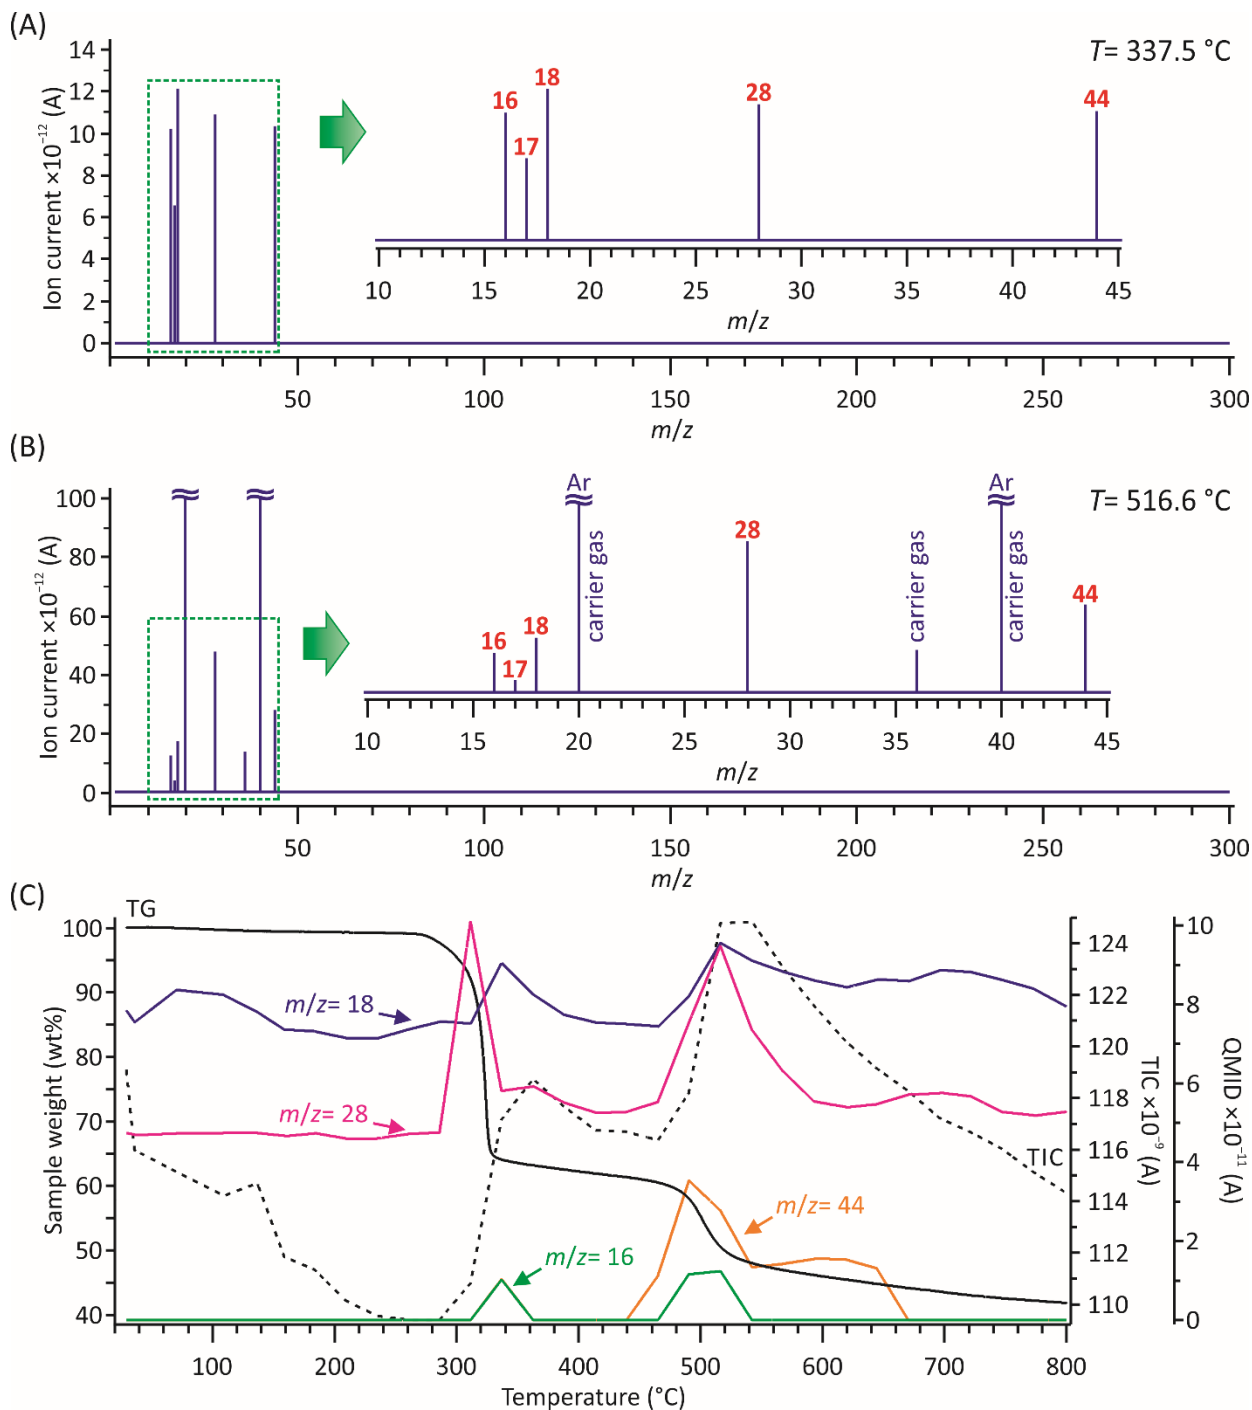

**Figure S20.** Simultaneous thermal analysis (STA) of compound **3** in argon (heating rate  $5\text{ }^{\circ}\text{C min}^{-1}$ ) coupled with quadrupole mass spectrometry (QMS) of the evolved gases: (A) QMS spectrum obtained at  $337.5\text{ }^{\circ}\text{C}$ , (B) QMS spectrum obtained at  $516.6\text{ }^{\circ}\text{C}$ , (C) TG (black, solid line), Total Ion Current (TIC, black, dashed line) and QMS curves (coloured lines) for the ions with selected values of  $m/z$ .

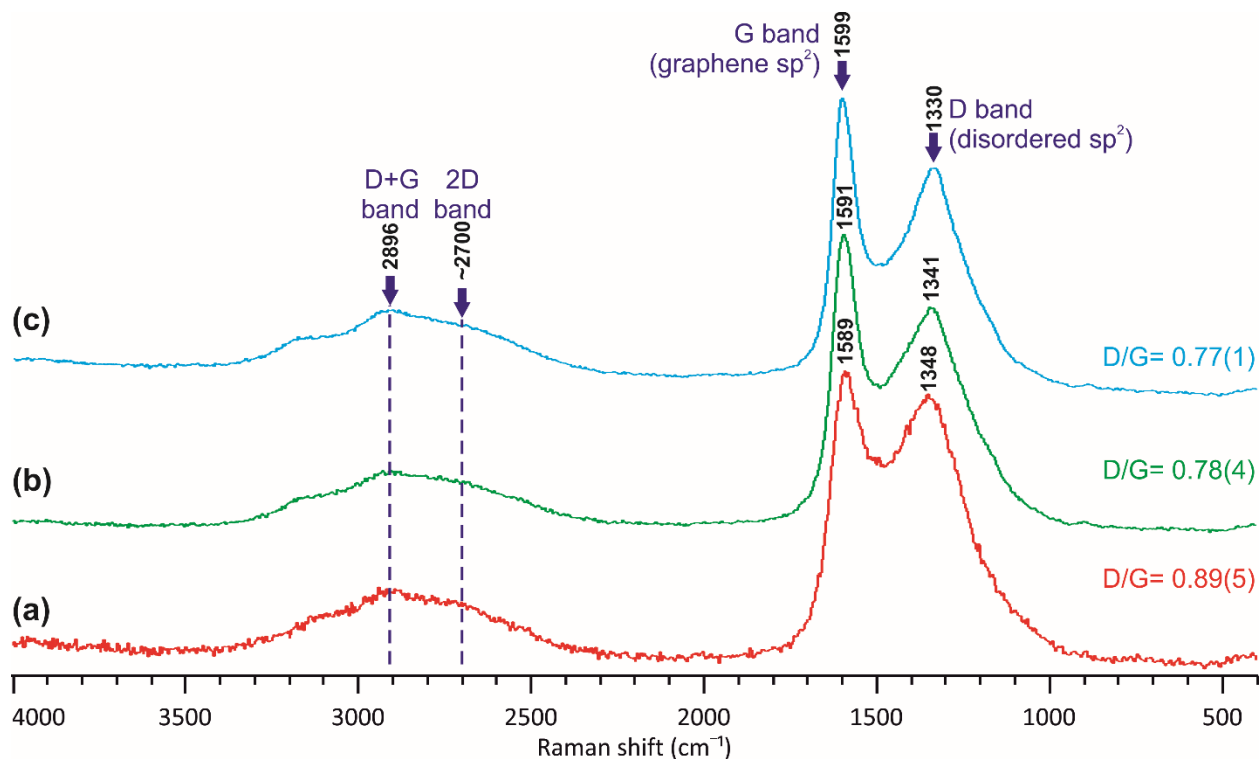

**Figure S21.** Raman spectra of the solid residues obtained in the course of thermal degradation (6 h in argon at 600 °C) of compound: (a) **1**, (b) **2**, and (c) **3**. D/G denotes a ratio of the D band intensity to the G band intensity (an error of estimation is given in parenthesis).

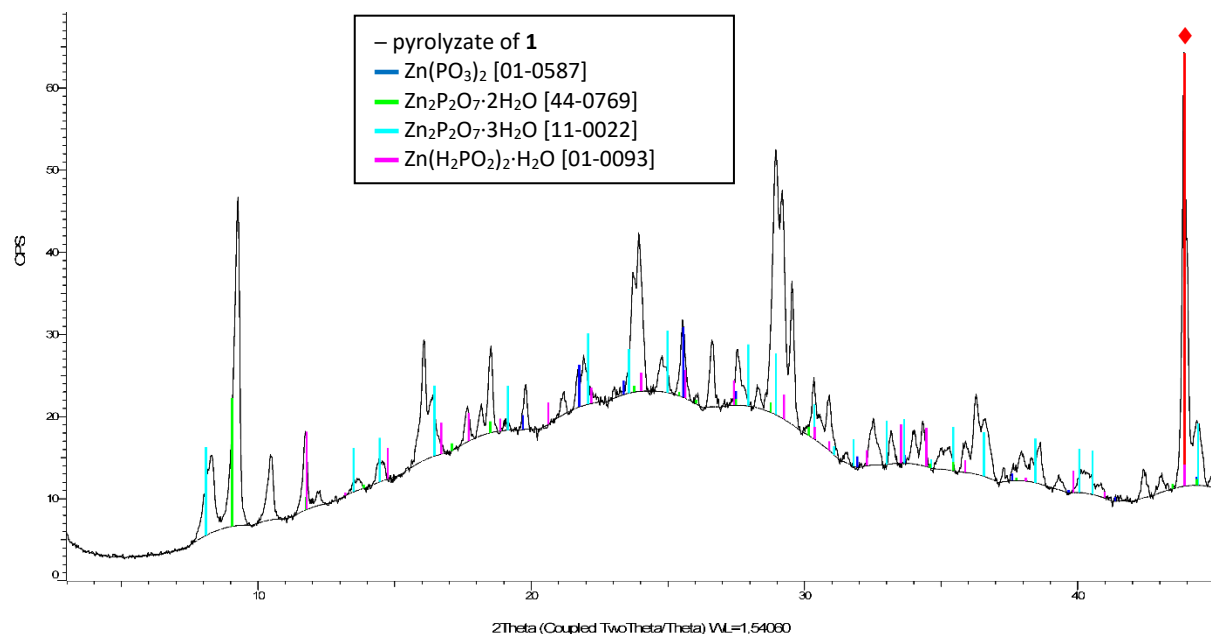

**Figure S22.** PXRD pattern of the solid residue obtained from thermal decomposition of compound **1** carried out for 6 h in argon at 600 °C (black line): the reflection around 44° (denoted with ♦) results from diamond powder used as an internal standard. Reflections characteristic of crystal phases of some selected condensed zinc phosphates or their hydrates are indicated with the coloured bars, together with their respective Powder Diffraction File numbers (in square brackets).

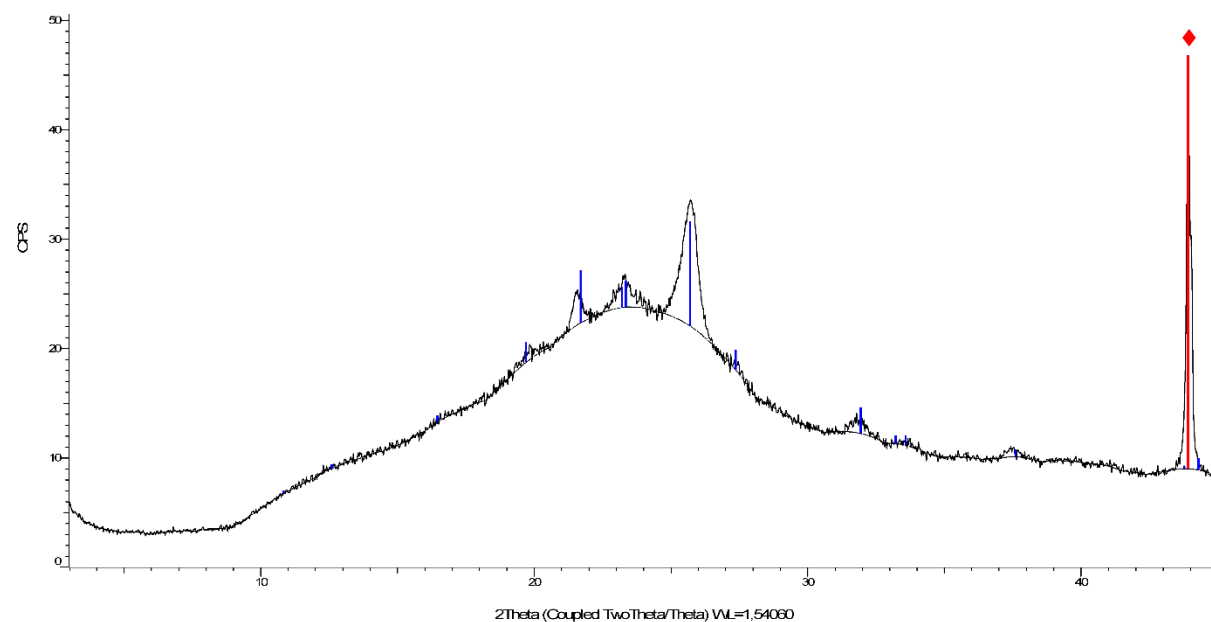

**Figure S23.** PXRD pattern of the solid residue obtained from thermal decomposition of compound **2** carried out for 6 h in argon at 600 °C (black line): the reflection around 44° (denoted with ♦) results from diamond powder used as an internal standard. Reflections characteristic of  $\text{Zn}(\text{PO}_3)_2$  crystal phase [Powder Diffraction File No 30-1488] are indicated with dark blue bars.

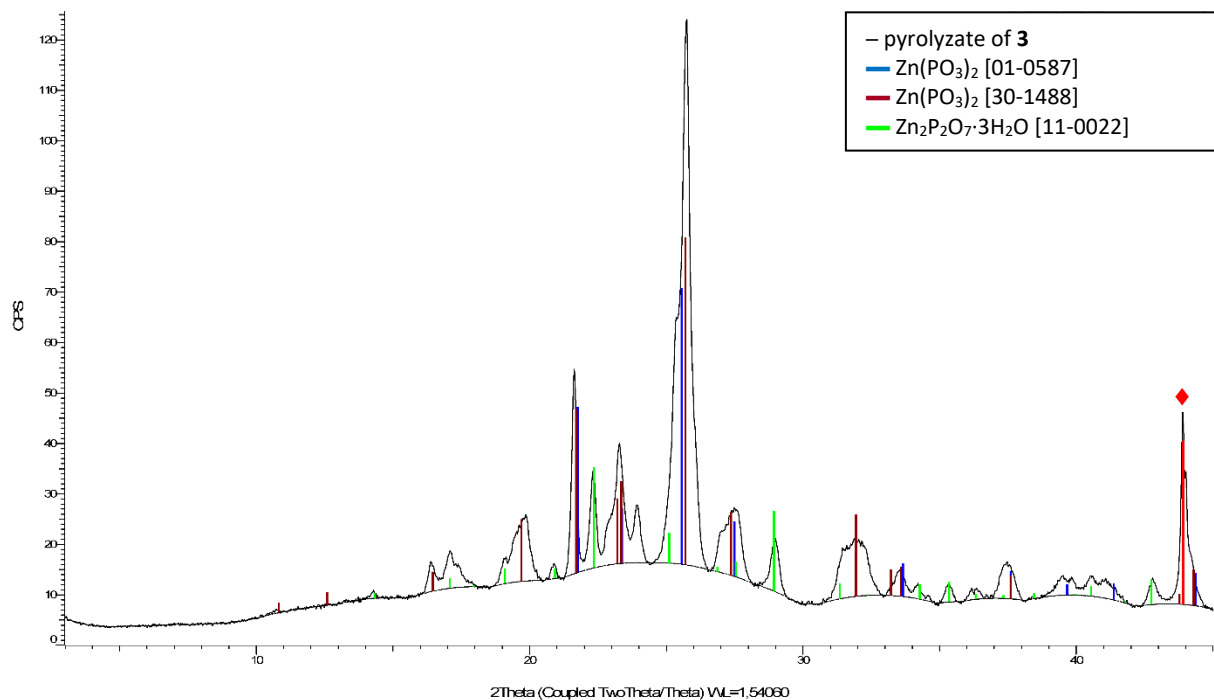

**Figure S24.** PXRD pattern of the solid residue obtained from thermal decomposition of compound **3** carried out for 6 h in argon at 600 °C (black line): the reflection around 44° (denoted with ♦) results from diamond powder used as an internal standard. Reflections characteristic of crystal phases of some selected condensed zinc phosphates are indicated with the coloured bars, together with their respective Powder Diffraction File numbers (in square brackets).

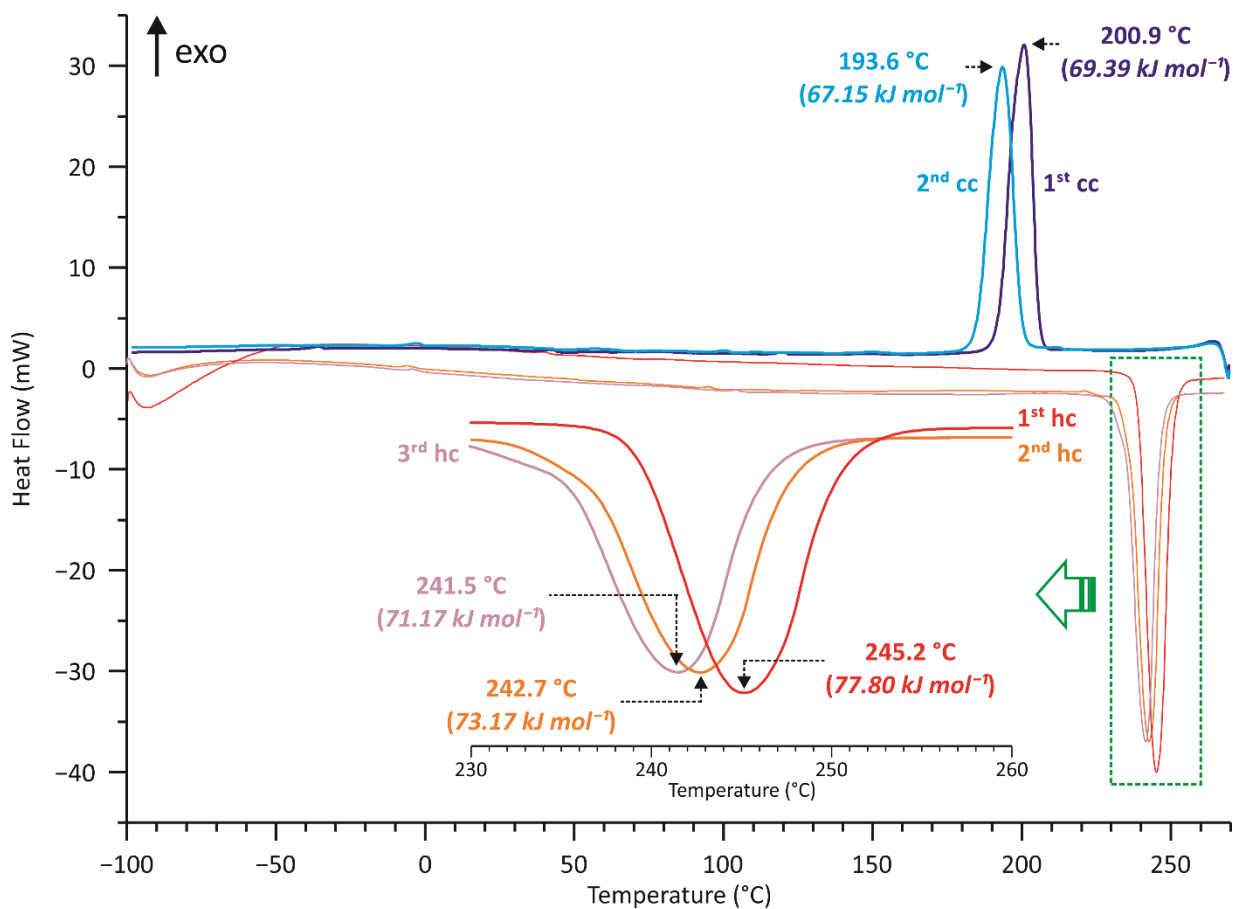

**Figure S25.** DSC traces of compound **1**. Enthalpies of the first-order transitions are given in parentheses. Heating (—, — or —) and cooling (— and —) runs are depicted. Heating/cooling rates of 10 °C min<sup>-1</sup>. Abbreviations: 1<sup>st</sup> hc, 2<sup>nd</sup> hc and 3<sup>rd</sup> hc – first, second and third heating curve, respectively; 1<sup>st</sup> cc and 2<sup>nd</sup> cc – first and second cooling run curve.

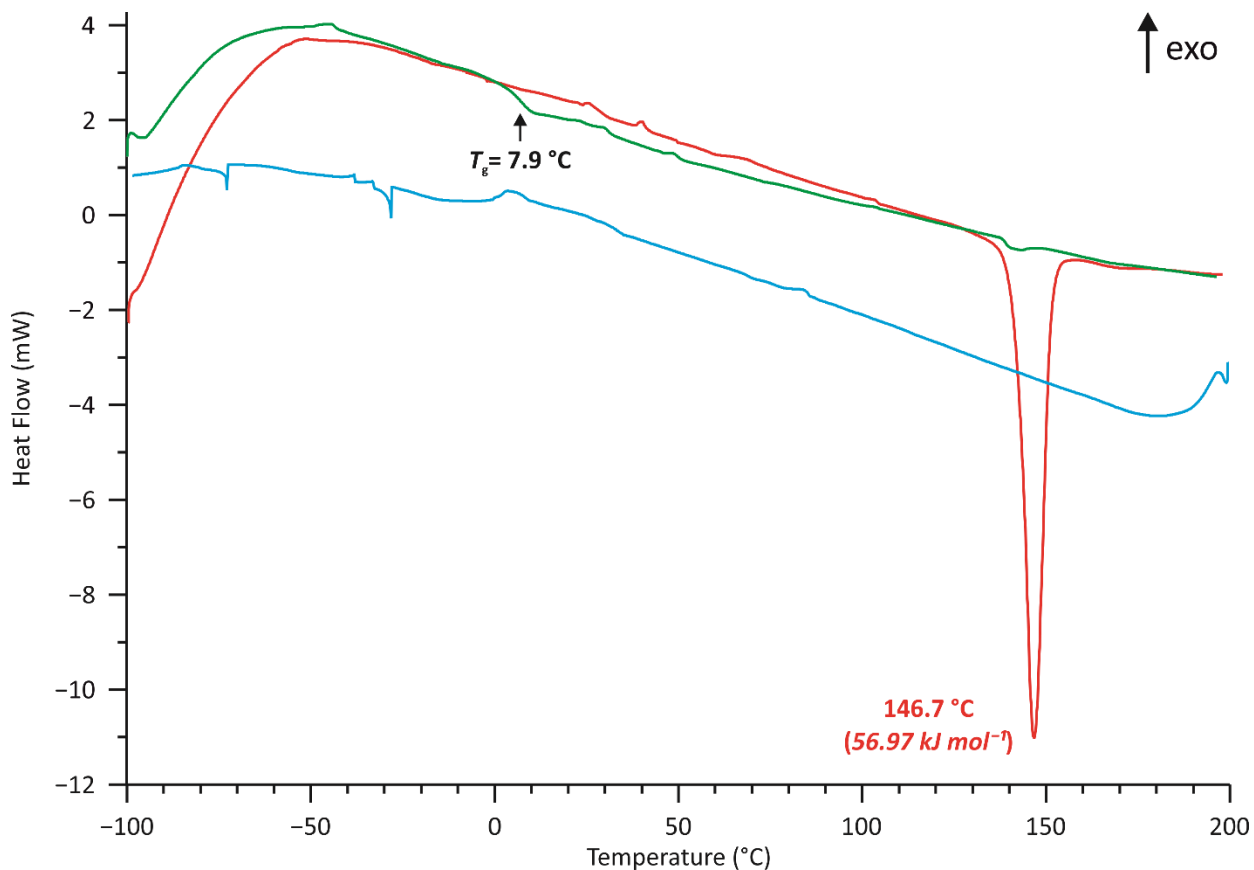

Figure S26. DSC traces of compound **3**: 1<sup>st</sup> heating (—), cooling (—) and 2<sup>nd</sup> heating (—) runs are depicted. Heating/cooling rates of  $10\text{ }^\circ\text{C min}^{-1}$ . Enthalpy of the first-order transition is given in parentheses. Abbreviation:  $T_g$  – glass transition temperature.

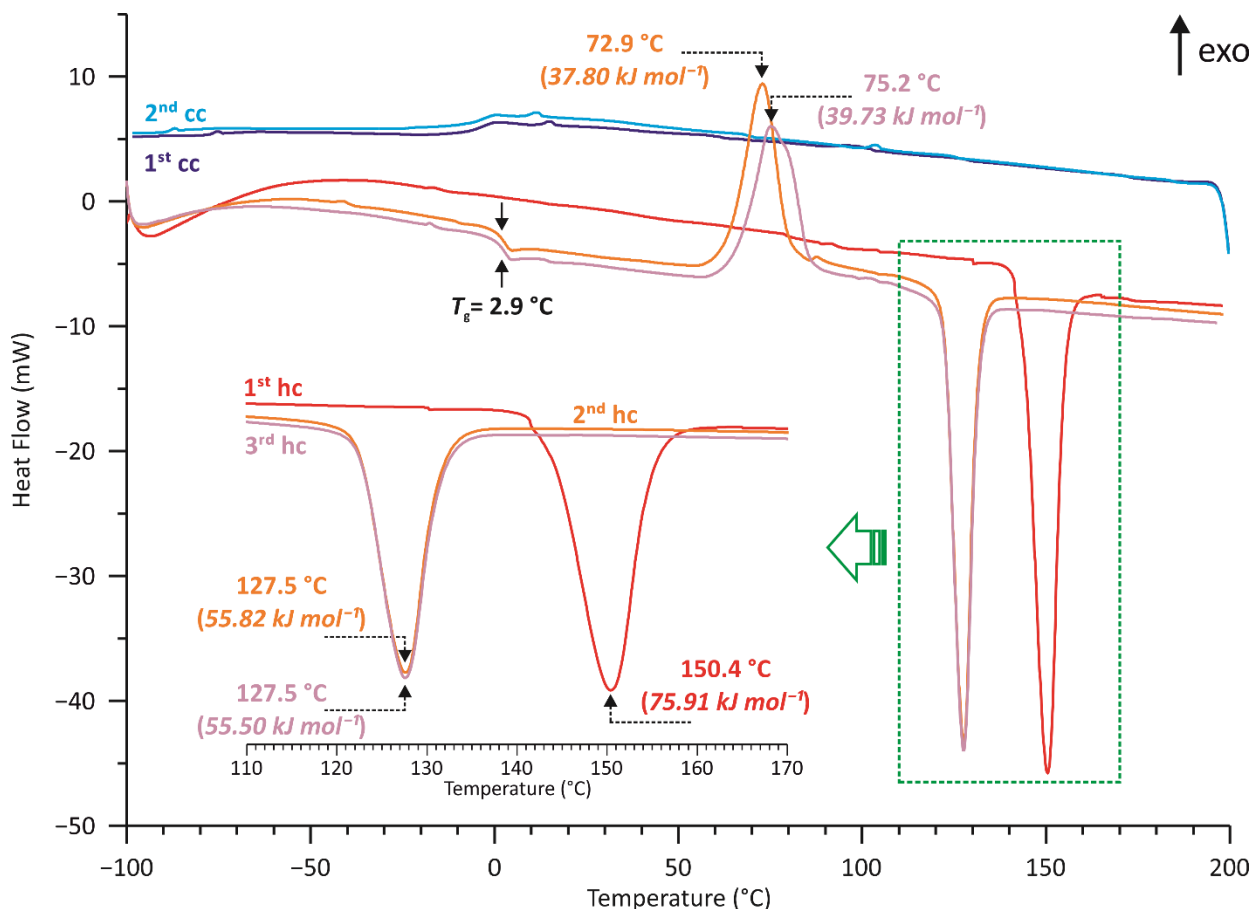

Figure S27. DSC traces of compound **2**. Enthalpies of the first-order transitions are given in parentheses. Heating (—, — or —) and cooling (— and —) runs are depicted. Heating/cooling rates of  $10\text{ °C min}^{-1}$ . Abbreviations: **1<sup>st</sup> hc**, **2<sup>nd</sup> hc** and **3<sup>rd</sup> hc** – first, second and third heating curve, respectively; **1<sup>st</sup> cc** and **2<sup>nd</sup> cc** – first and second cooling run curve;  $T_g$  – glass transition temperature.



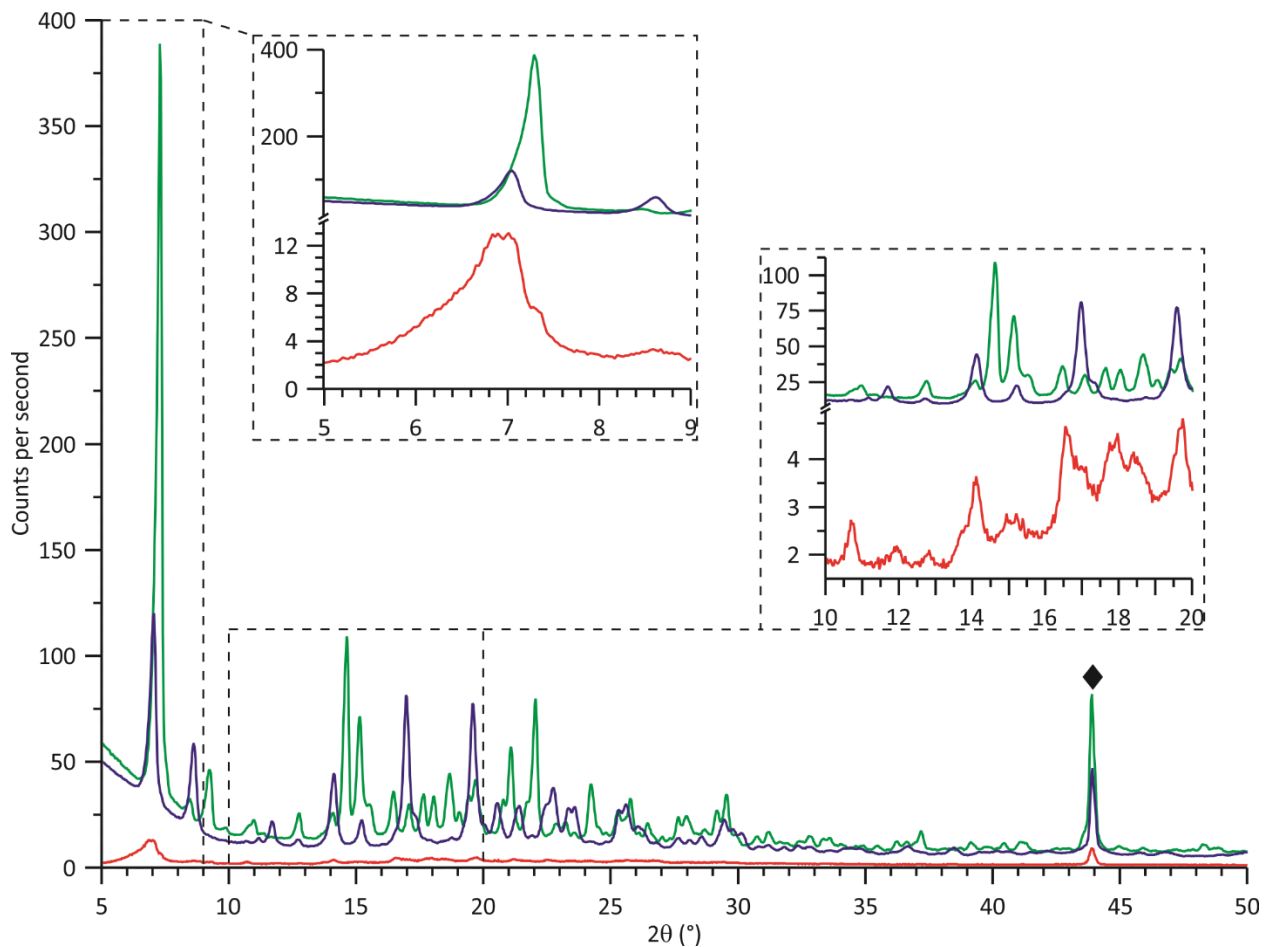

Figure **S28**. The experimental PXRD patterns of compound **2** recorded at room temperature: before thermal treatment (—), after conditioning at 160 °C for 3 h (—), and with additional conditioning at 90 °C (—). The reflection around 44° (denoted with ♦) results from diamond powder used as an internal standard

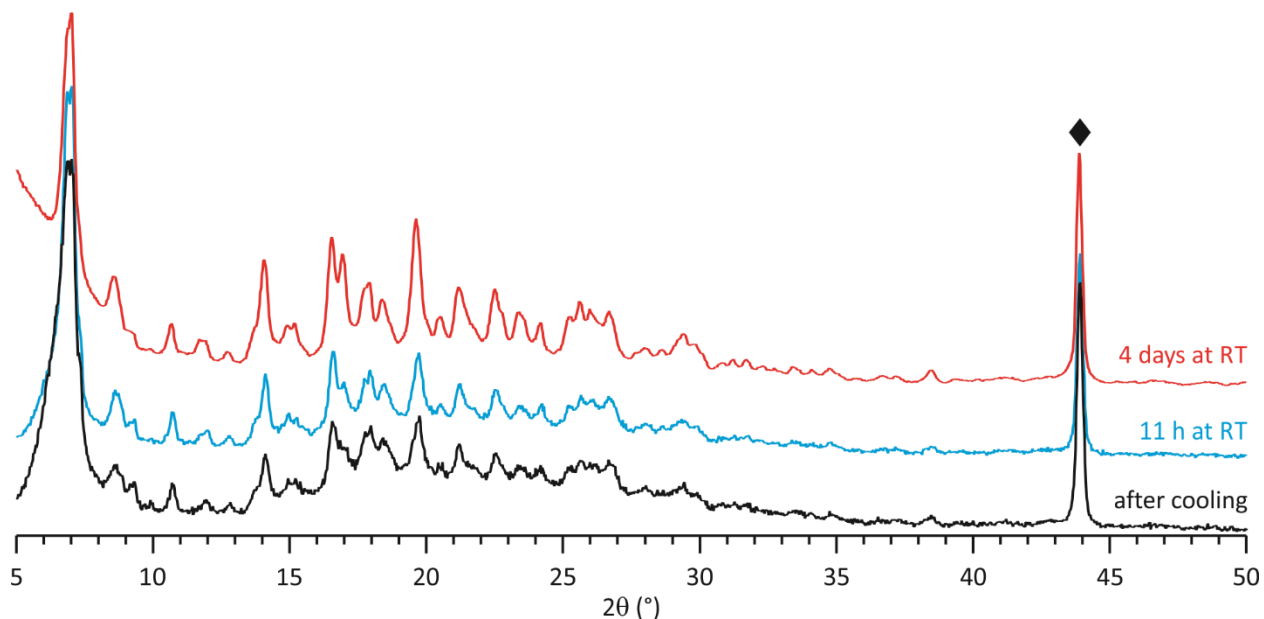

Figure S29. The experimental PXRD patterns recorded at room temperature after conditioning compound **2** at 160 °C for 3 h – sample measured: immediately after cooling to room temperature (—) and after 11 h (—) or 4 days (—) at room temperature. The diffractograms were normalized between 0 and 1. The reflection around 44° (denoted with ♦) results from diamond powder used as an internal standard.
